# Supplementary material for: Engineered human hepatocyte organoids enable CRISPR-based target discovery and drug screening for steatosis
Source: PubMed Central journal article supplement (PMC10635827; doi:10.1038/s41587-023-01680-4), 2023-02-23
Supplement: 41587_2023_1680_MOESM1_ESM.pdf [file 41587_2023_1680_MOESM1_ESM.pdf]

# Engineered human hepatocyte organoids enable CRISPR-based target discovery and drug screening for steatosis

---

In the format provided by the authors and unedited

## **Table of contents**

Supplementary Figures 1-15

Supplementary Tables 1-3



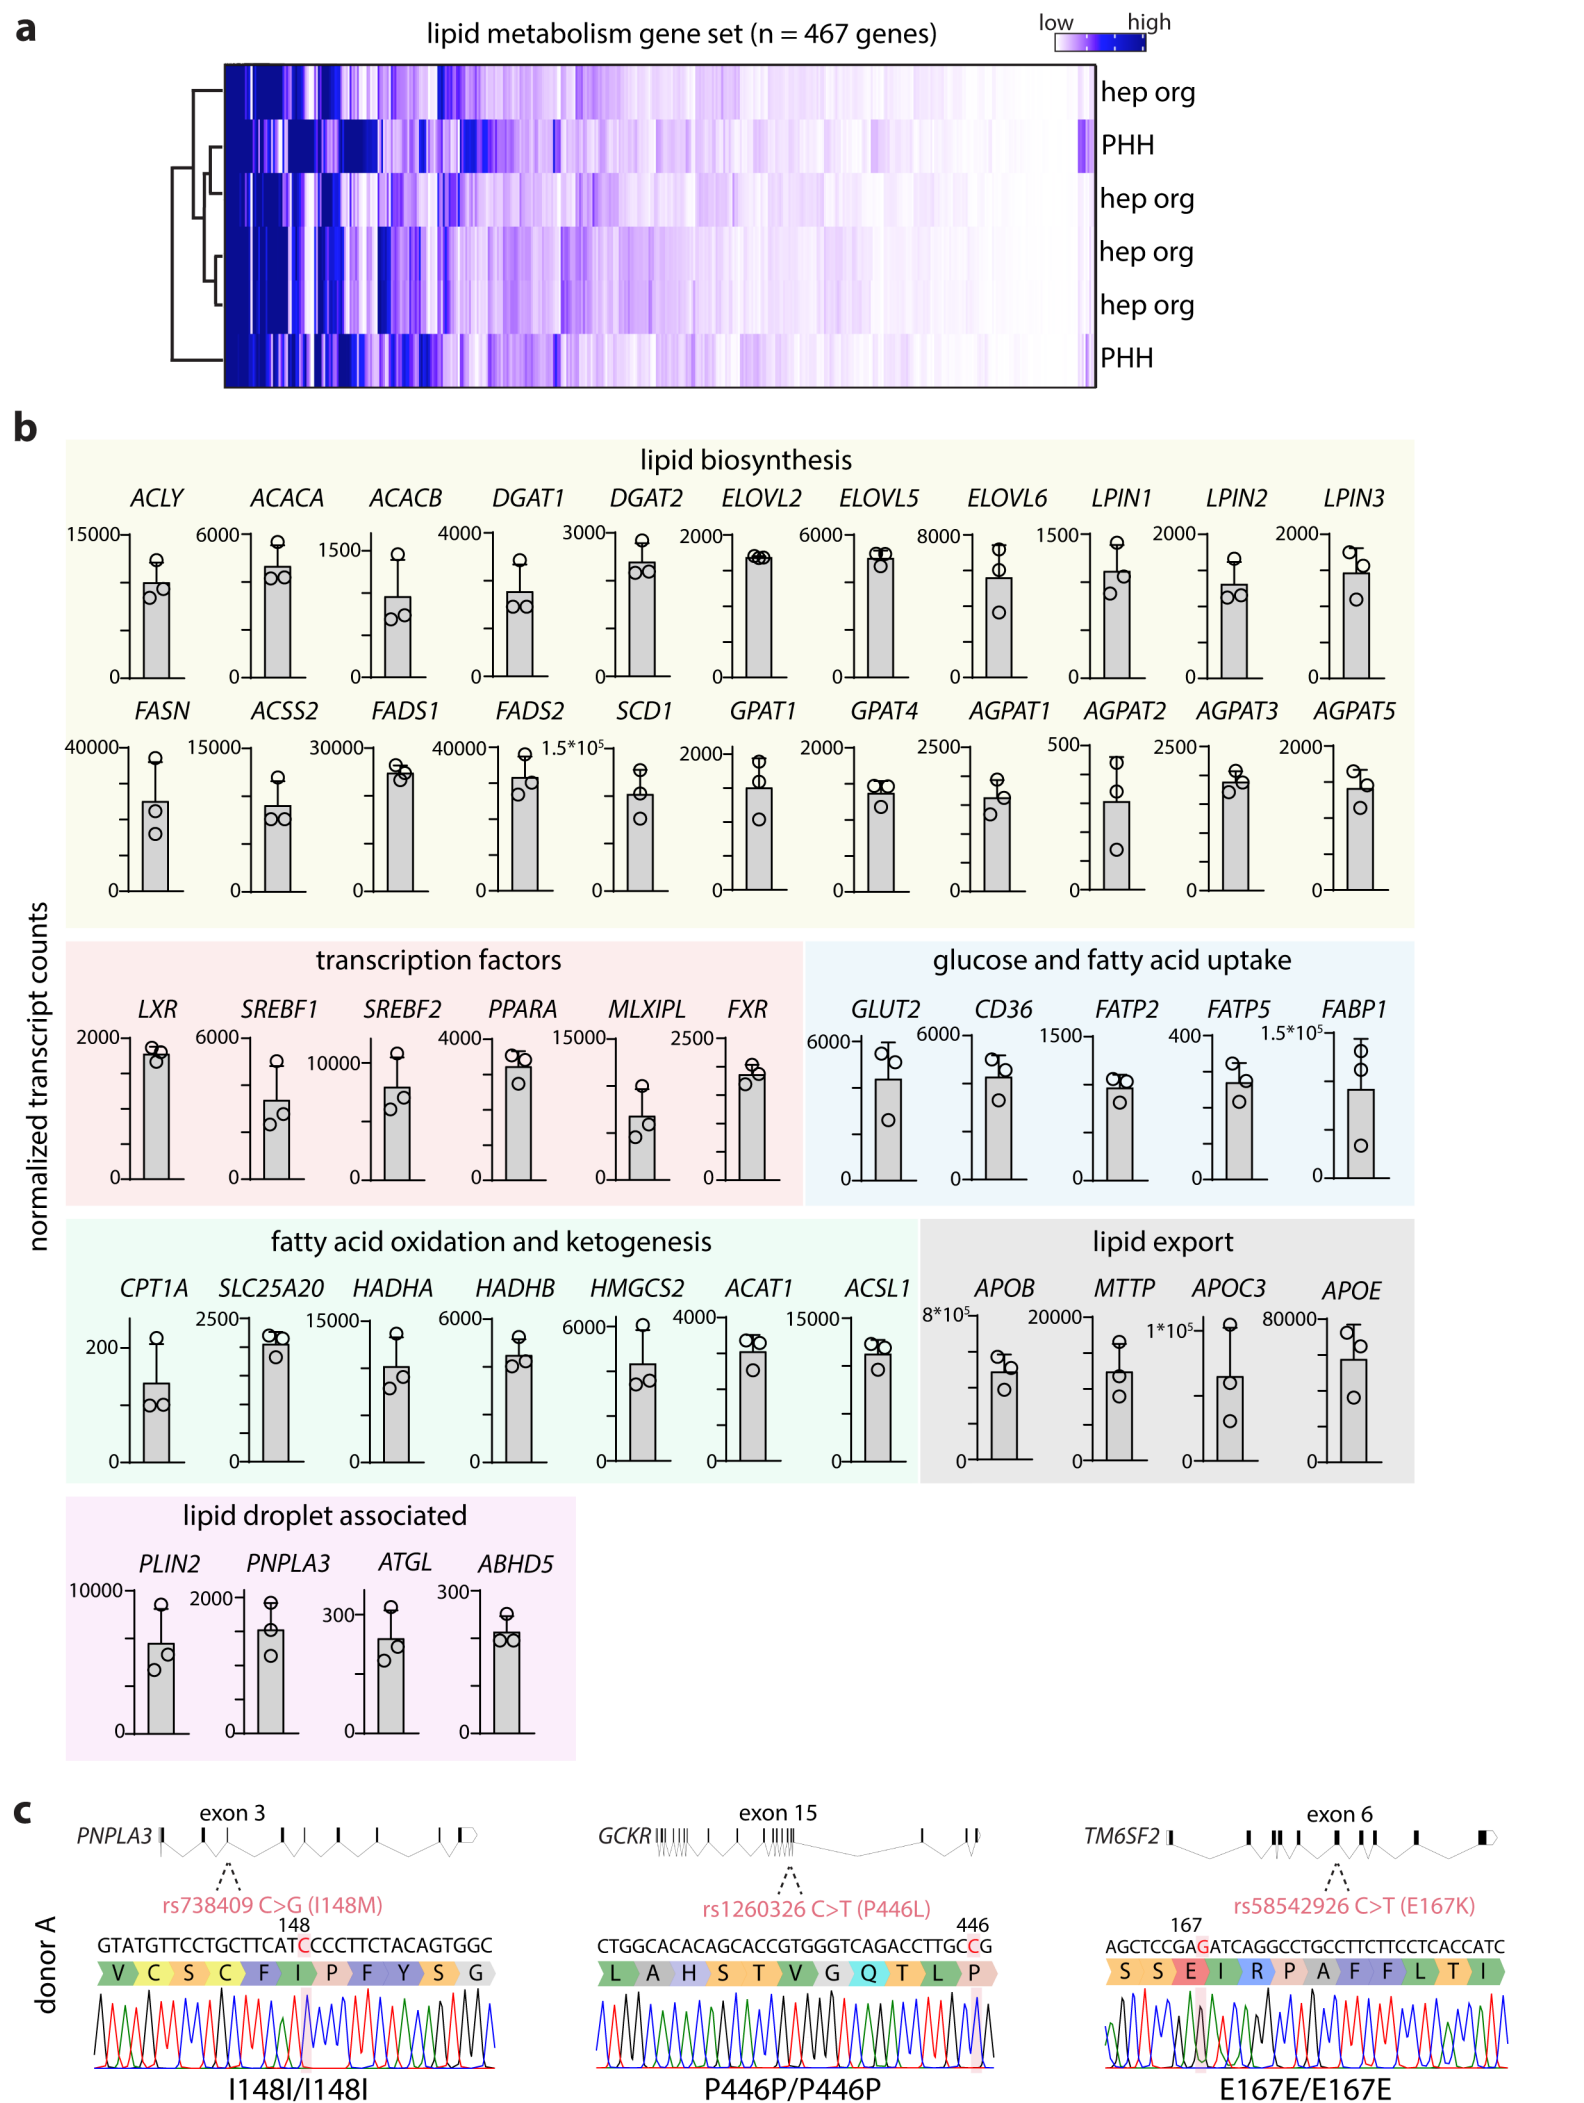

**Supplementary Figure 1. Lipid metabolism profiles and NAFLD risk SNP genotyping of human fetal hepatocyte organoids.**

**a**, Heatmap displaying the expression profiles of 467 lipid metabolism genes in human fetal hepatocyte organoids (hep org) and primary human hepatocytes (PHH). Transcript levels within each sample are visualized on a scale from low (0 transcripts, white) to high (6000 transcripts, dark blue).

**b**, Expression of genes related to different processes encompassing lipid metabolism in human fetal hepatocyte organoids. Normalized transcripts from bulk RNA-sequencing are plotted with the mean + SD. Dots represent expression levels in organoid lines from 3 donors.

**c**, Sanger trace sequencing examples of an organoid line (donor A) for the top NAFLD risk SNPs in the *PNPLA3*, *GCKR*, and *TM6SF2* genes, showing the donor to be wild type for all SNPs.

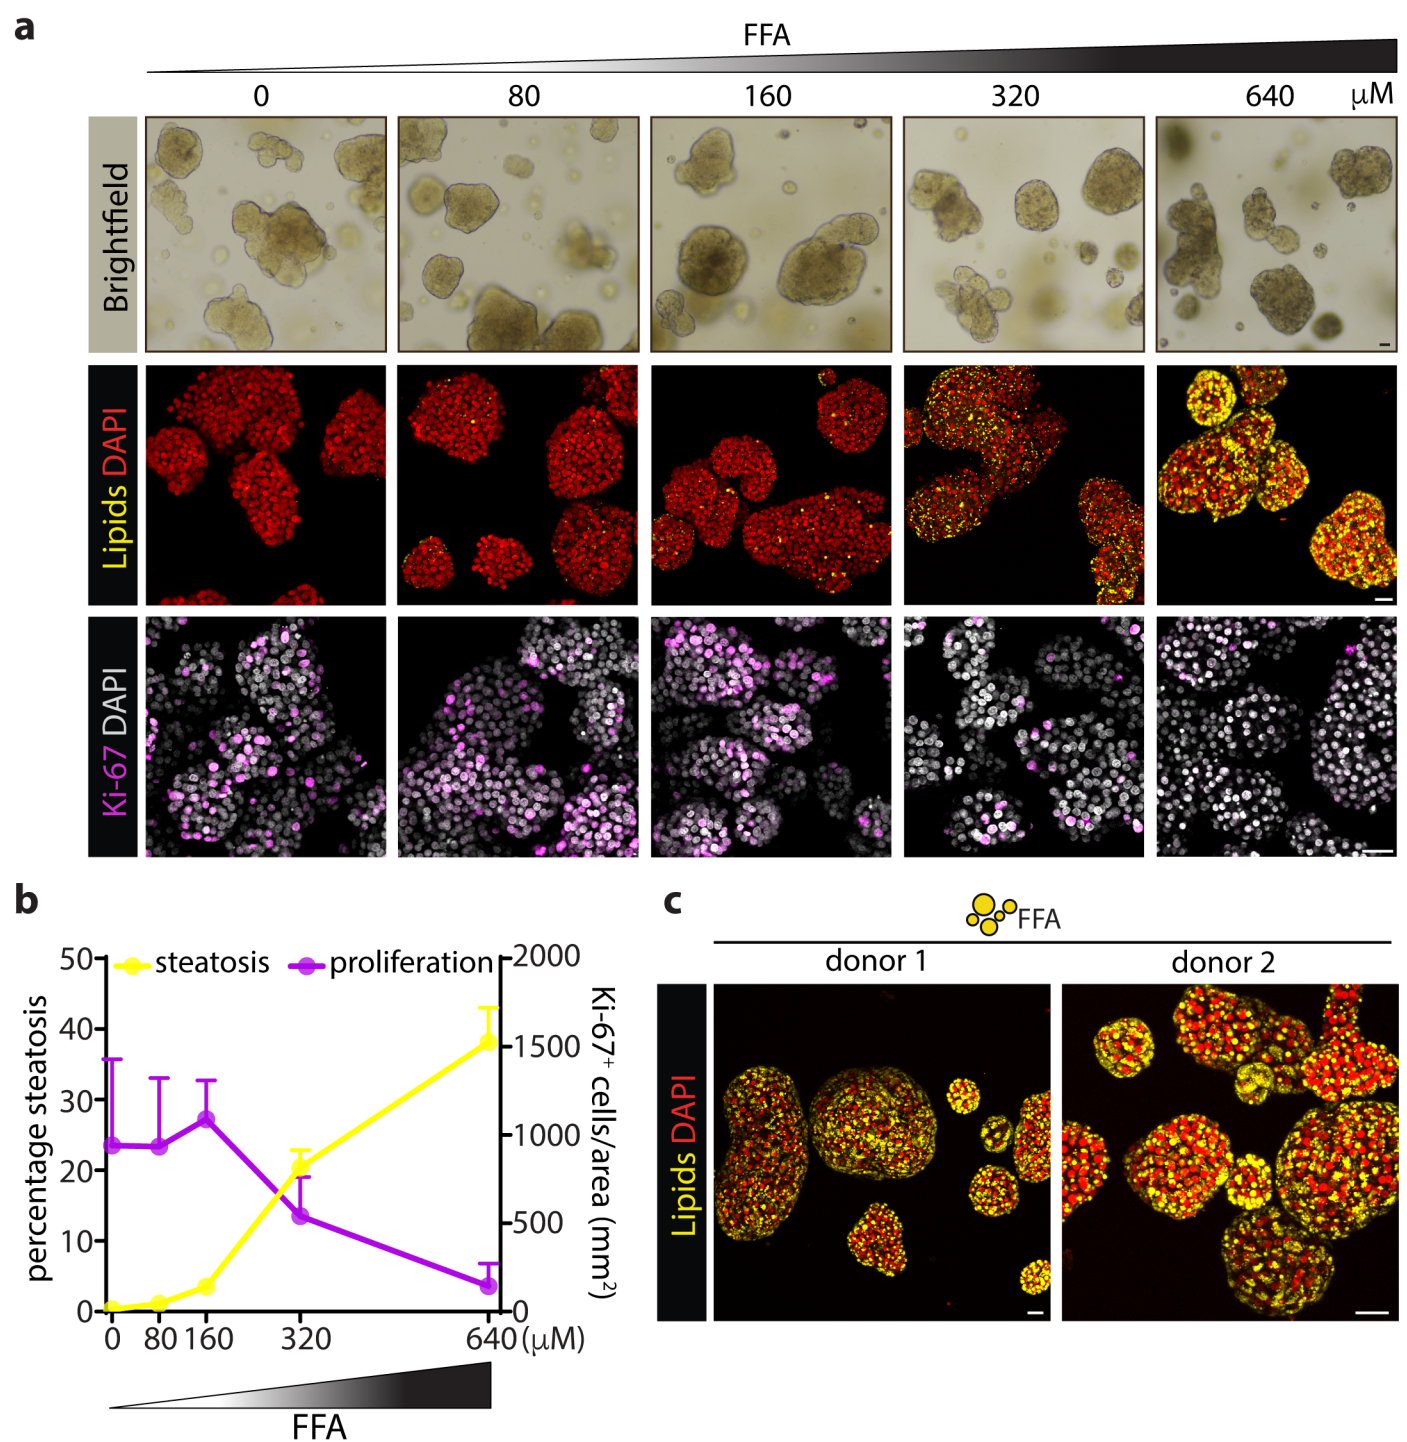

**Supplementary Figure 2. Exogenous free fatty acids induce steatosis and impair proliferation.**

**a**, Brightfield images, Nile Red lipid staining, and immunofluorescence staining for Ki-67 of wild type organoids exposed to increasing concentrations of FFAs for 5 days.

**b**, Quantification of the percentage of steatosis (left y-axis) as well as the amount of Ki-67<sup>+</sup> cells/organoid area (right y-axis) in wild type organoids after FFA exposure for 5 days (mean + SD). n = 6 independent replicates from 2 donors (steatosis level), n = 5 independent replicates representative of 2 donors (Ki-67).

**c**, Nile Red lipid staining of FFA-exposed organoids (500  $\mu\text{M}$ ) from 2 donors.

**a, c**, Representative of n = 2 and 6 independent experiments, respectively.

Scale bars, 50  $\mu\text{m}$  (brightfield) and 25  $\mu\text{m}$  (fluorescence) (**a**), 25  $\mu\text{m}$  (**c**).



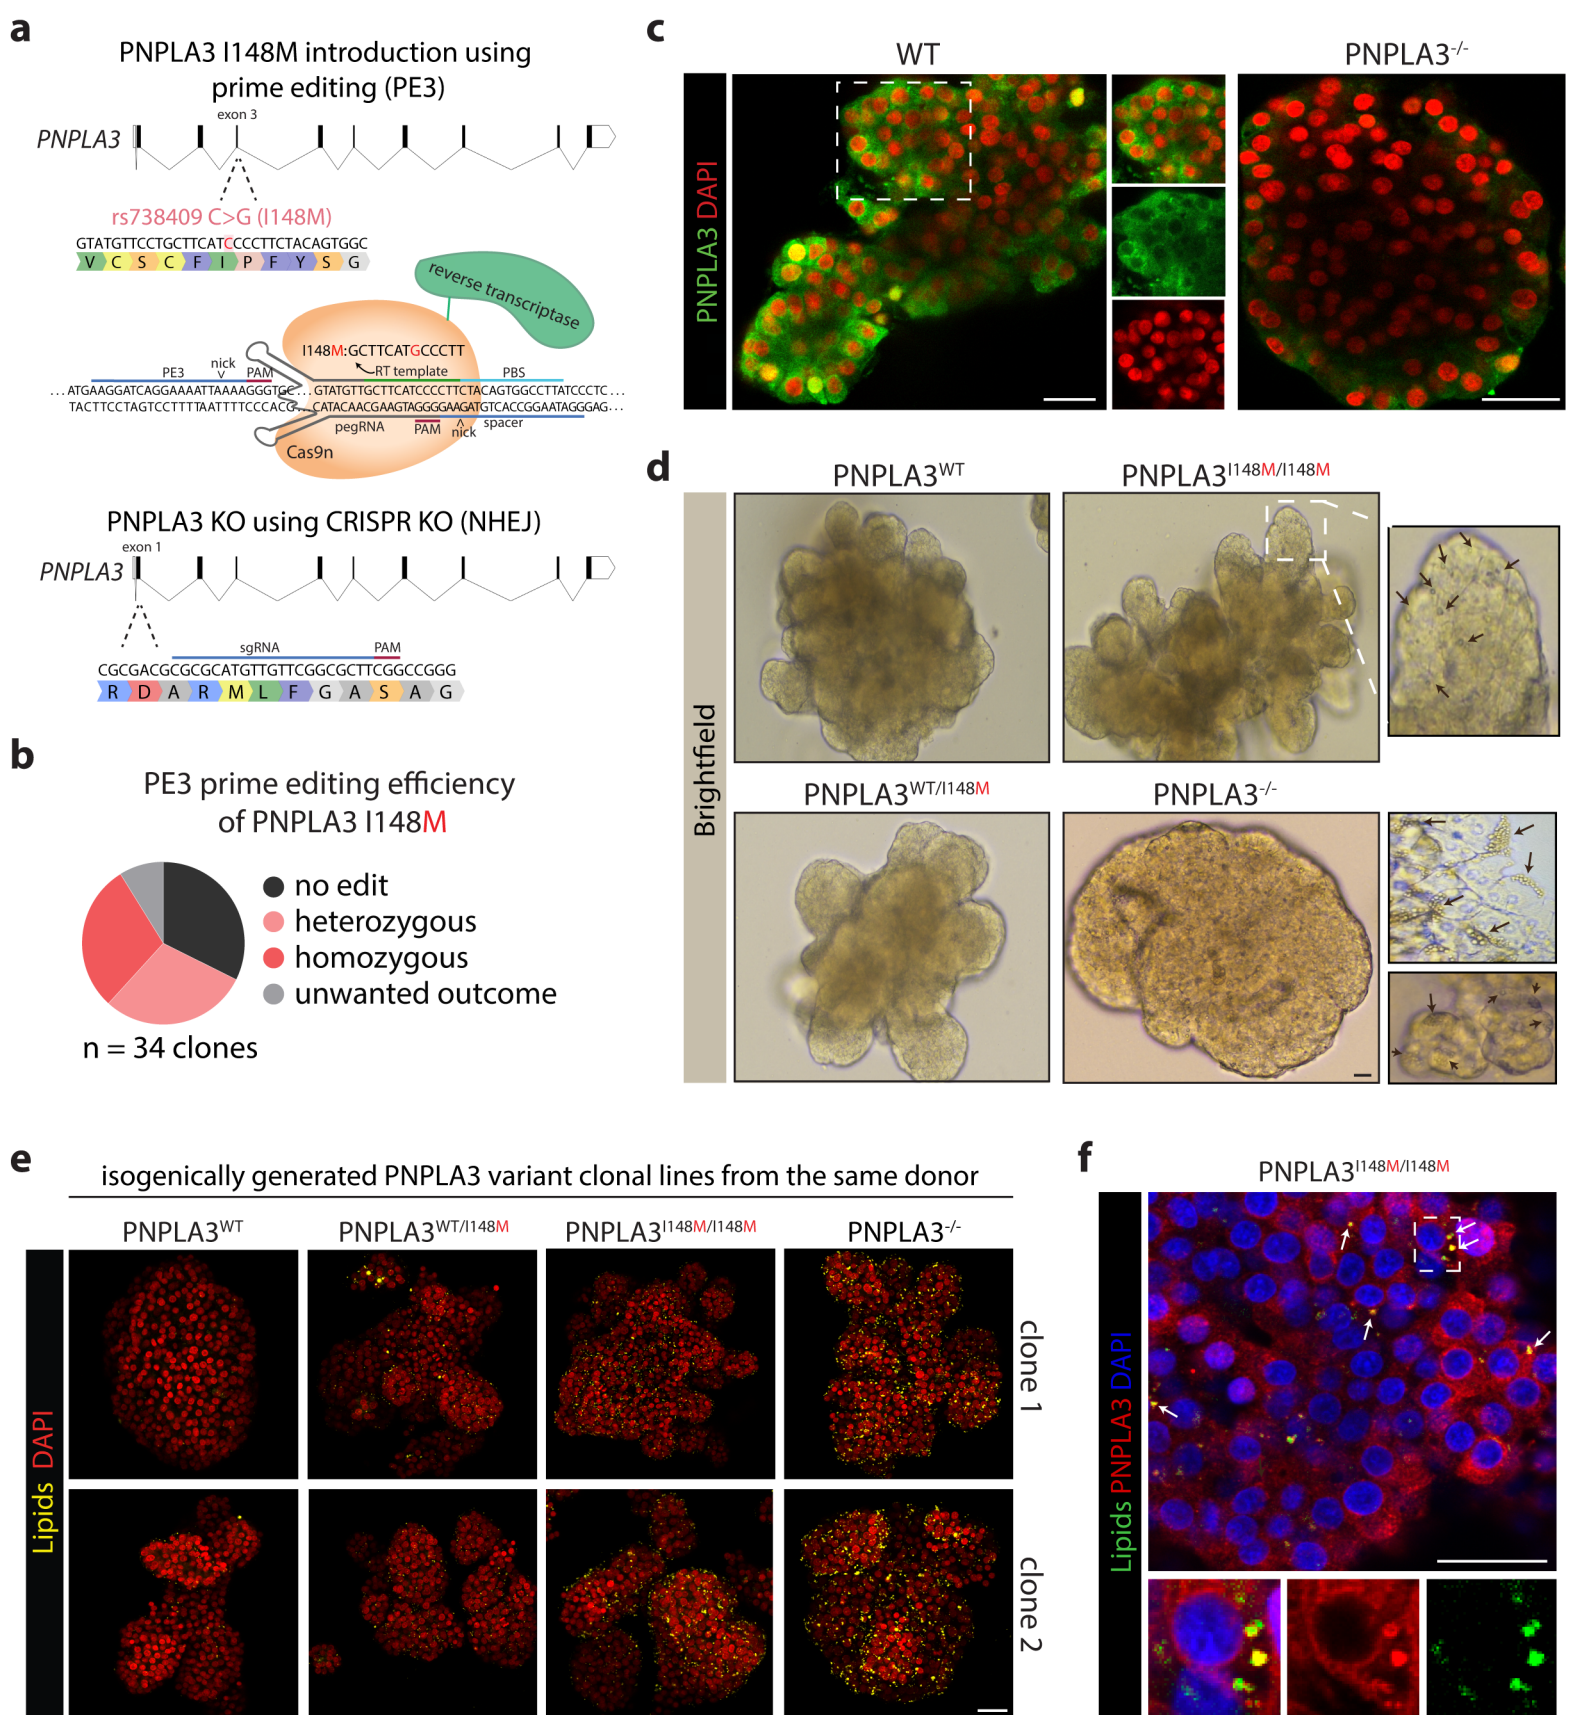

### Supplementary Figure 3. Generation of PNPLA3 variant organoids.

**a**, Strategy to introduce the I148M mutation in the *PNPLA3* gene using PE3 prime editing (top) and the sgRNA used to generate PNPLA3 knock-out organoids (bottom).

**b**, Assessment of PE3 prime editing efficiency to introduce the I148M mutation.

**c**, Immunofluorescence staining for PNPLA3 in wild type and *PNPLA3*<sup>-/-</sup> organoids, confirming the loss of PNPLA3 protein upon knock-out of *PNPLA3*.

**d**, Brightfield images of PNPLA3 variant organoids. Arrows point at visible clusters of lipid droplets.

**e**, Nile Red lipid staining of 2 different generated clonal lines per *PNPLA3* genotype, all engineered from the same donor, demonstrating reproducible steatosis levels related to the different *PNPLA3* genotypes.

**f**, Immunofluorescence staining for PNPLA3 and lipid droplet visualization with BioTracker 488 Green Lipid Droplet Dye in *PNPLA3*<sup>I148M/I148M</sup> organoids. Arrows highlight the frequent overlap between strong PNPLA3 fluorescent signal and lipid droplets.

**c, d, e, f**, Representative of n = 3, 6, 6, and 3 independent experiments, respectively.

Scale bars, 25 μm (**c, d, f**), 50 μm (**e**).

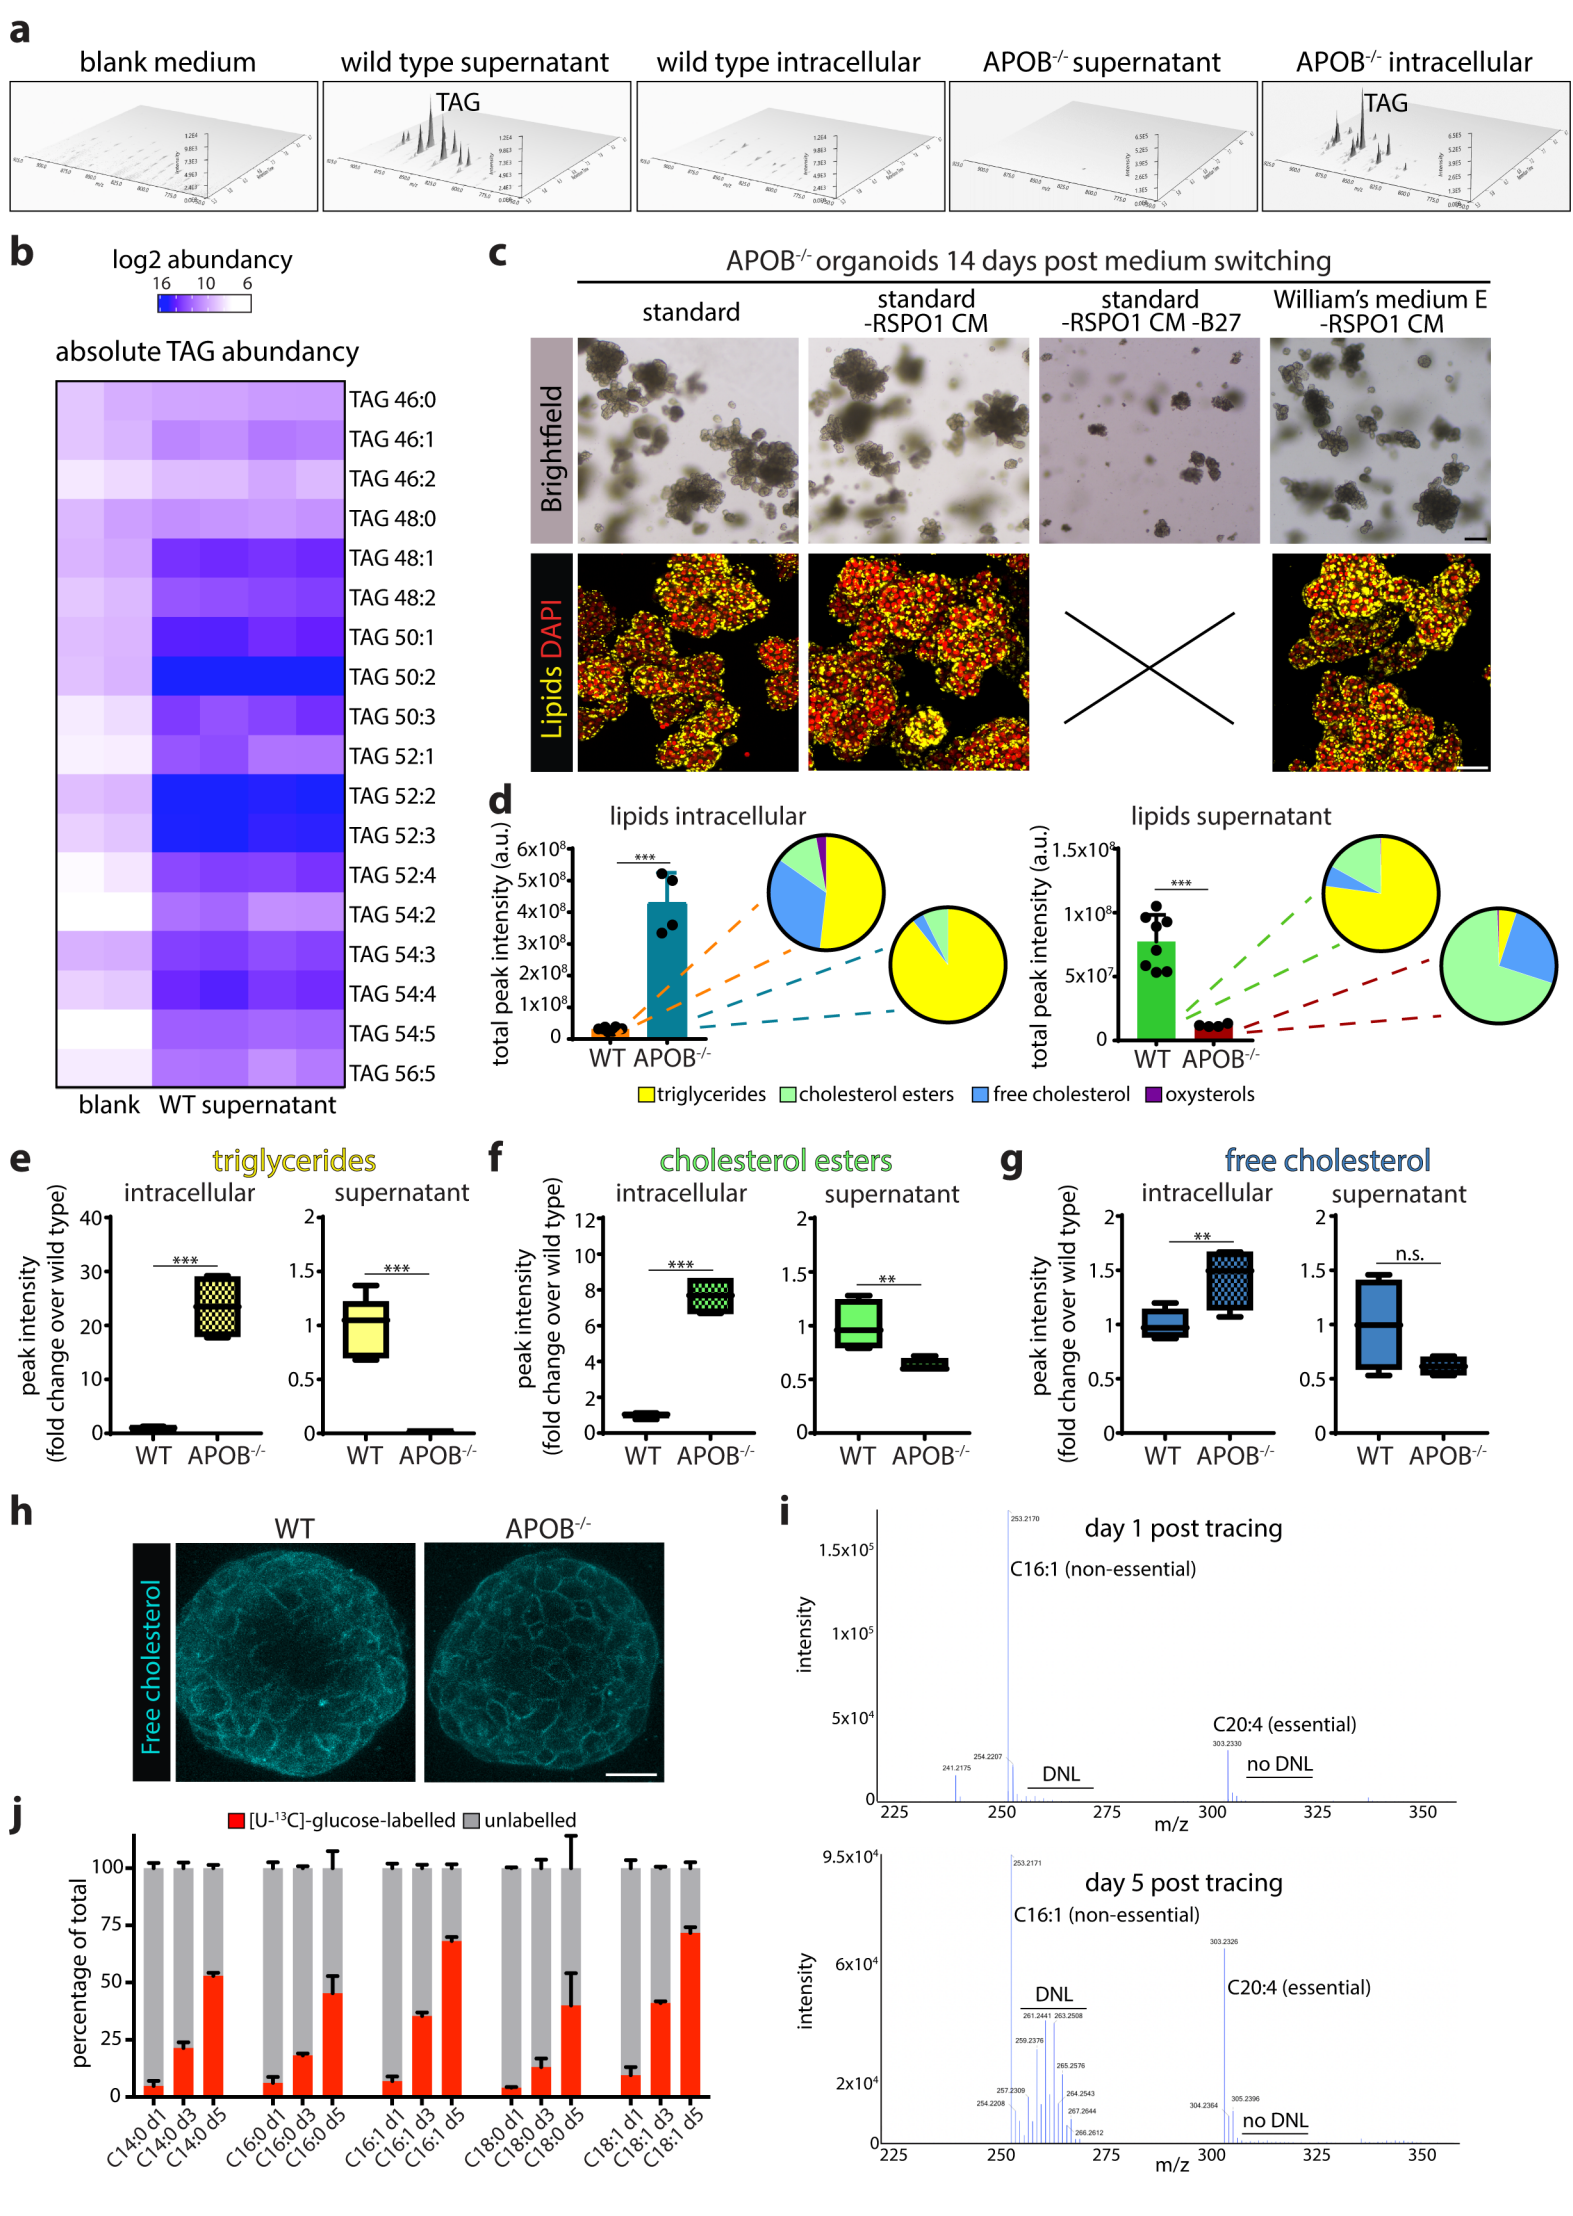

#### Supplementary Figure 4. Lipidomic characterization of wild type and *APOB*<sup>-/-</sup> organoids.

**a**, Surface plots of TAG species detected intracellularly and in the supernatant of wild type organoids and *APOB*<sup>-/-</sup> organoids, and comparison with blank medium, demonstrating active VLDL secretion in wild type organoids, while this is defective in *APOB*<sup>-/-</sup> organoids as showcased by the absence of TAG in the medium.

**b**, Heatmap displaying the absolute abundance (log<sub>2</sub>-transformed) of TAG species in the supernatant of 3-day-cultured wild type organoids and comparison with blank medium. Each column is an independent replicate. n = 4 organoid cultures from 2 donors, n = 2 for blank medium.

**c**, Brightfield images and Nile Red lipid staining of medium withdrawal experiments confirm that withdrawal of putative lipid sources in the medium (e.g. RSPO1-conditioned medium (CM)) does not alter the steatosis phenotype of *APOB*<sup>-/-</sup> organoids. Note that organoids did not survive in the standard -RSPO1 CM -B27 condition and therefore Nile Red lipid staining could not be performed.

**d**, Quantification of the total neutral lipids (TAG, cholesterol esters, free cholesterol, and oxysterols) detected in wild type and *APOB*<sup>-/-</sup> organoids intracellularly (left) and in the supernatant (right) (mean + SD). The pie charts indicate the average composition of the different lipid species (not scaled to abundance). n = 4 independent measurements in *APOB*<sup>-/-</sup> organoid cultures from 2 donors, n = 8 independent measurements in wild type organoid cultures from the same 2 donors. Two-tailed *t*-test:  $P < 0.0001$  (\*\*\*). a.u. = arbitrary units.

**e-g**, Quantification of the accumulation/reduction of specific lipid species (**e**, triglycerides; **f**, cholesterol esters; **g**, free cholesterol) in *APOB*<sup>-/-</sup> organoids intracellularly and in the supernatant relative to the amount detected in wild type organoids. Sample sizes as in **d**. Two-tailed *t*-test: triglycerides intracellular *APOB*<sup>-/-</sup> vs WT,  $P < 0.0001$  (\*\*\*); triglycerides supernatant *APOB*<sup>-/-</sup> vs WT,  $P < 0.0001$  (\*\*\*); cholesterol esters intracellular *APOB*<sup>-/-</sup> vs WT,  $P < 0.0001$  (\*\*\*); cholesterol esters supernatant *APOB*<sup>-/-</sup> vs WT,  $P = 0.0075$  (\*\*); free cholesterol intracellular *APOB*<sup>-/-</sup> vs WT,  $P = 0.0036$  (\*\*); n.s. = not significant.

**h**, Filipin III staining marking free cholesterol in wild type and *APOB*<sup>-/-</sup> organoids, demonstrating its predominant presence on the membrane.

**i**, Representative mass spectra highlighting the selectivity in [U-<sup>13</sup>C]-glucose incorporation between the non-essential (C16:1) and essential (C20:4) fatty acid at day 1 (top) and day 5 (bottom) post tracing in of *APOB*<sup>-/-</sup> organoids. Note at day 5 the extensive labelling of DNL-derived C16:1 species, which have a higher m/z due to the <sup>13</sup>C (instead of <sup>12</sup>C) labelling. Instead, no labelling for C20:4 is seen during the entire tracing period, as this fatty acid is essential and cannot be formed by DNL.

**j**, Quantification of the percentage of glucose-driven DNL contribution for the five non-essential fatty acids that can be formed by DNL after 1, 3, and 5 days of tracing in *APOB*<sup>-/-</sup> organoids (mean + SD). n = 2 independent quantifications in *APOB*<sup>-/-</sup> organoid cultures from 2 donors.

**e-g**, The box indicates the 25-75th percentiles, the centre line indicates the median and the whiskers indicate minimum and maximum values.

**c, h**, Representative of n = 3 and 2 independent experiments, respectively.

Scale bars, 200 μm (brightfield) and 50 μm (fluorescence) (**c**), 50 μm (**h**).



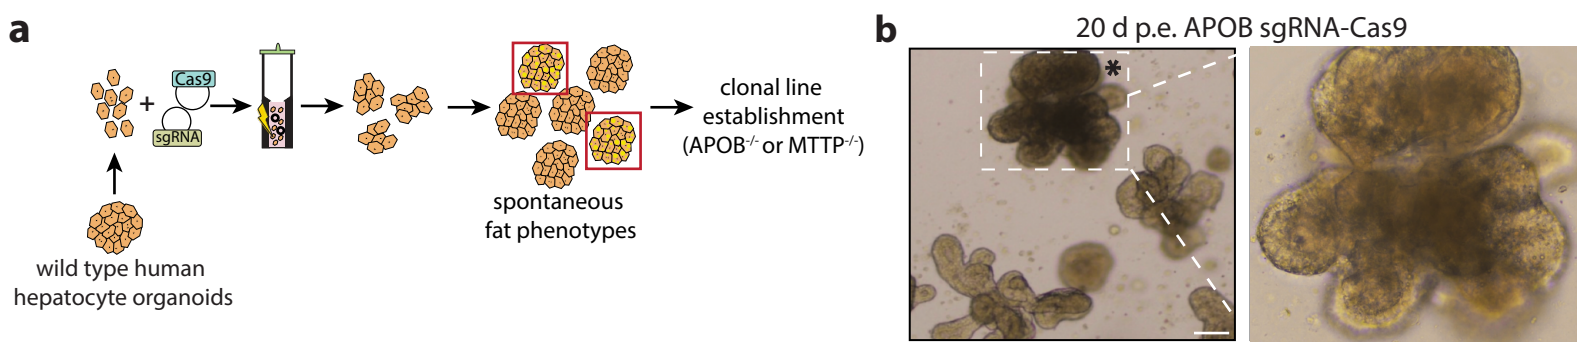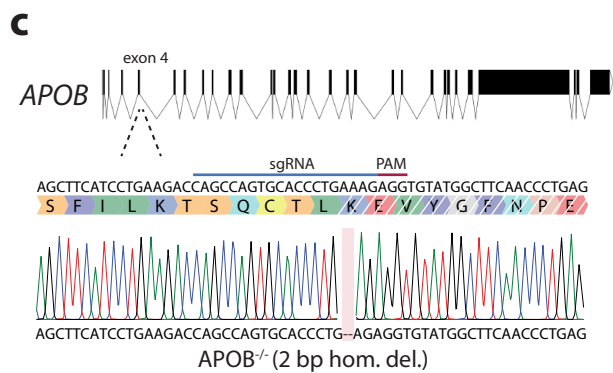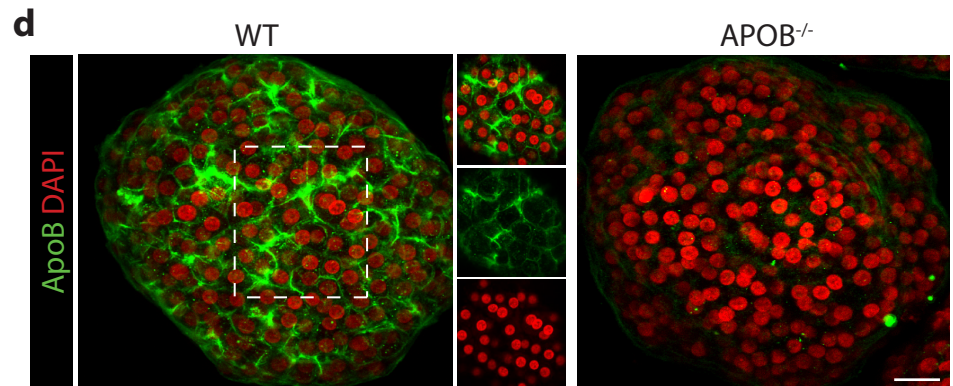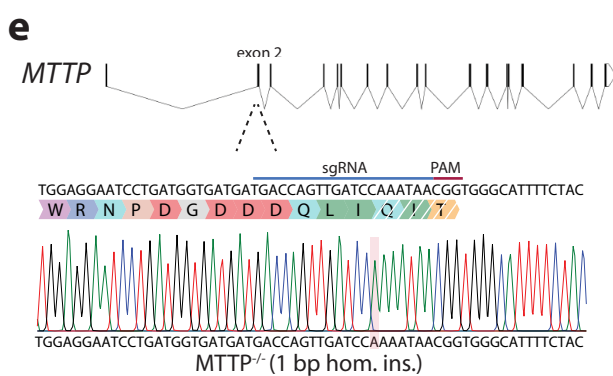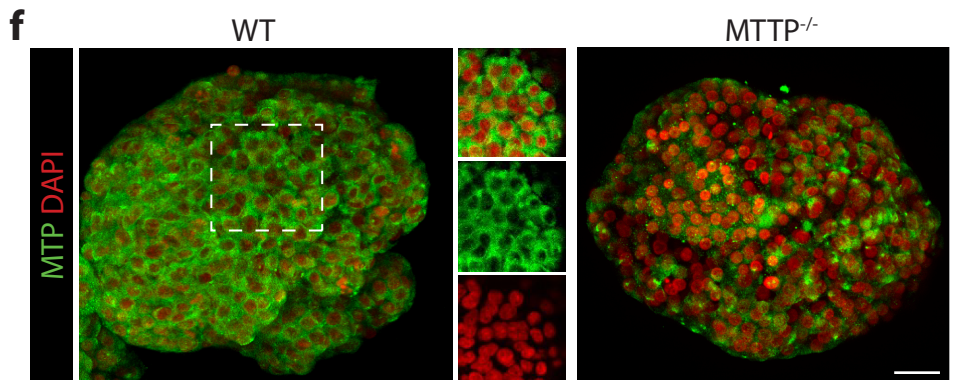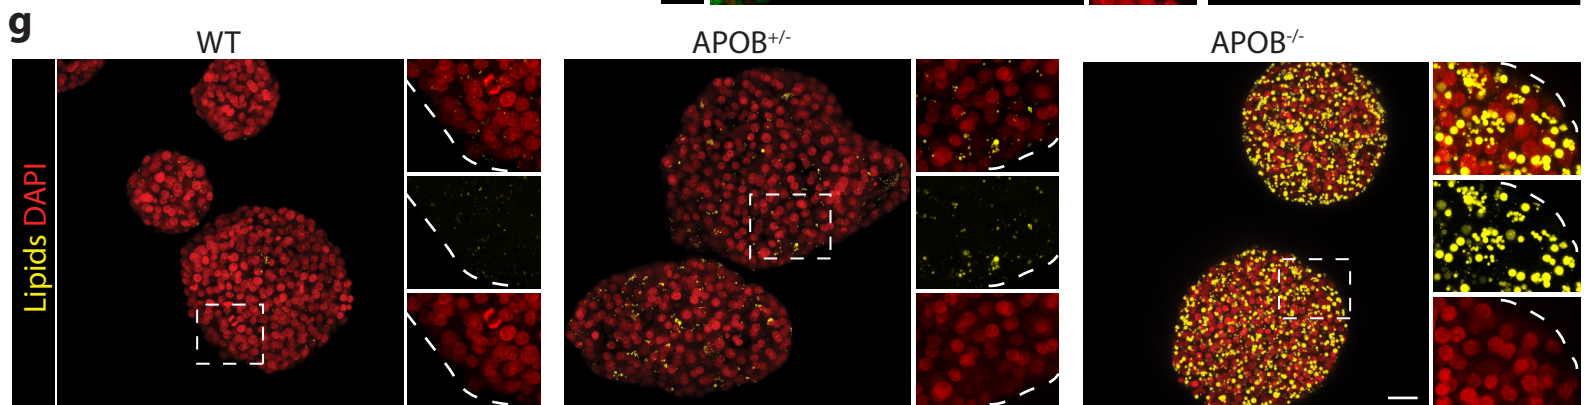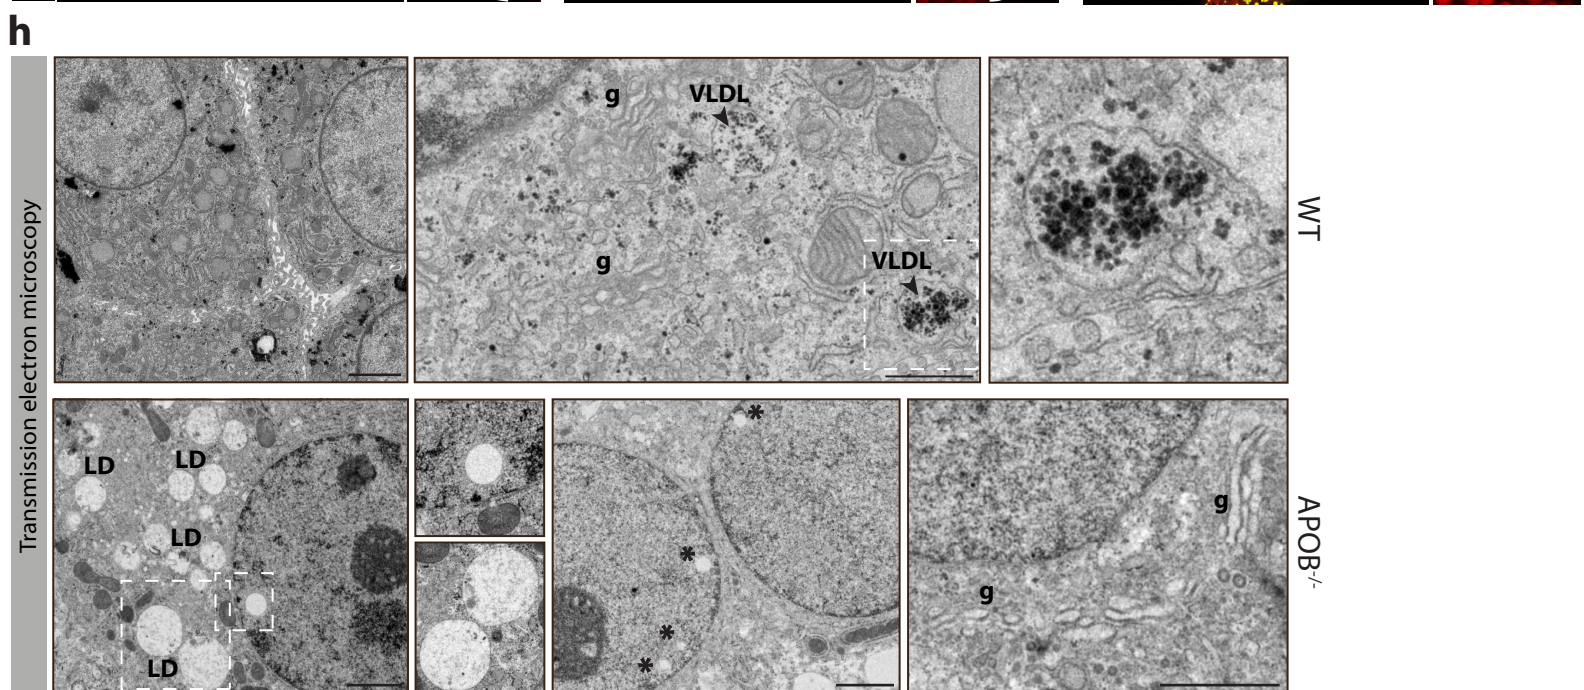

### Supplementary Figure 5. Characterization of *APOB*- and *MTTP*-mutant human hepatocyte organoids.

- a**, Strategy to CRISPR engineer human hepatocyte organoids and generate *APOB*<sup>-/-</sup> or *MTTP*<sup>-/-</sup> organoid lines.
- b**, Representative example of an outgrowing organoid culture upon electroporation with *APOB*-sgRNA/Cas9, demonstrating the spontaneous outgrowth of darker -lipid containing- organoids (highlighted by the asterisk).
- c**, Schematic of the sgRNA used to generate *APOB* knock-out organoids (top) and a Sanger trace sequencing example of a generated clonal *APOB*<sup>-/-</sup> line (bottom).
- d**, Immunofluorescence staining for ApoB in wild type and *APOB*<sup>-/-</sup> organoids, confirming the loss of ApoB protein upon knock-out of *APOB*.
- e**, Schematic of the sgRNA used to generate *MTTP* knock-out organoids (top) and a Sanger trace sequencing example of a generated clonal *MTTP*<sup>-/-</sup> line (bottom).
- f**, Immunofluorescence staining for MTP in wild type and *MTTP*<sup>-/-</sup> organoids, confirming the loss of MTP protein upon knock-out of *MTTP*. Note that the signal detected in *MTTP*<sup>-/-</sup> organoids represents background staining, lacking cytoplasmic specificity.
- g**, Nile Red lipid staining of human hepatocyte organoids with different *APOB* genotypes (wild type, heterozygous knock-out, or homozygous knock-out).
- h**, Transmission electron microscopy images of wild type and *APOB*<sup>-/-</sup> organoids, demonstrating accumulation of lipid droplets (LD) of various sizes in *APOB*<sup>-/-</sup> organoids. Wild type organoids possess intact VLDL packaging as shown by the VLDL vesicles (VLDL), marked by arrowheads, around the Golgi apparatus (g), while these are absent in *APOB*<sup>-/-</sup> organoids. Asterisks indicate the presence of lipid droplets in the nucleus of *APOB*<sup>-/-</sup> organoids.
- d, f, g, h**, Representative of n = 2, 2, 3, and 2 independent experiments, respectively.
- Scale bars, 100 μm (**b**), 25 μm (**d, f**), 50 μm (**g**), 500 nm (left) and 100 nm (right) for wild type and all 100 nm for *APOB*<sup>-/-</sup> (**h**).



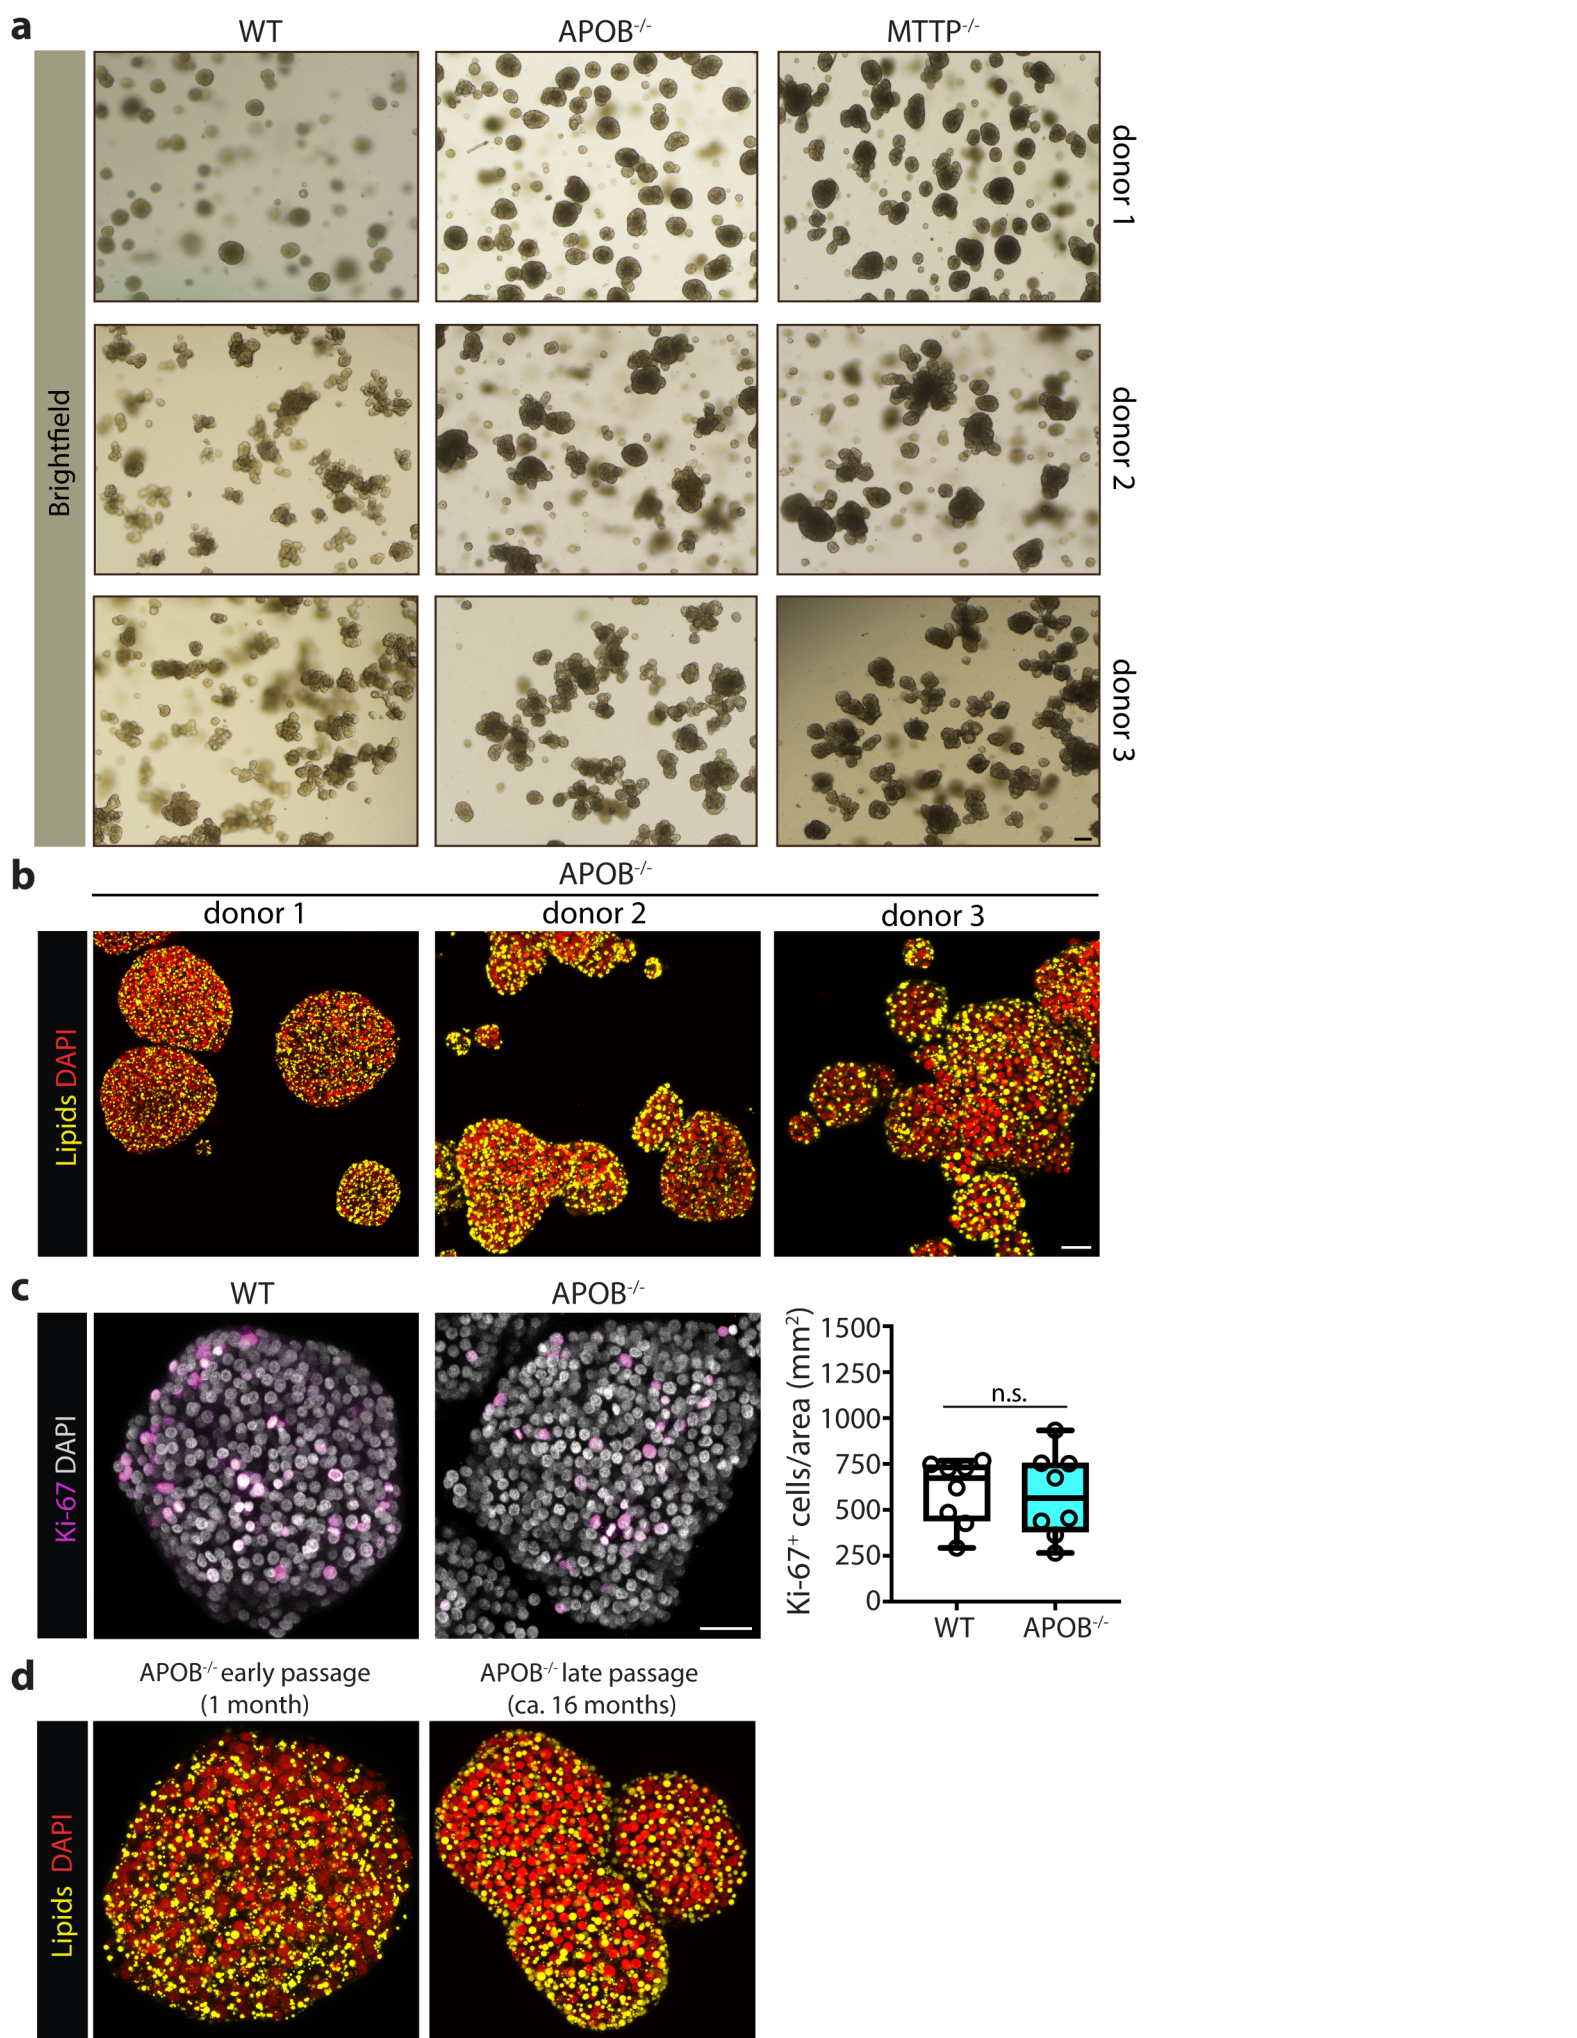

**Supplementary Figure 6. *APOB*<sup>-/-</sup> and *MTTP*<sup>-/-</sup> mutant organoids from multiple donors are proliferative.**

**a**, Brightfield images of WT, *APOB*<sup>-/-</sup>, and *MTTP*<sup>-/-</sup> organoid cultures from 3 different donors.

**b**, Nile Red lipid staining of *APOB*<sup>-/-</sup> organoids from 3 donors, demonstrating reproducible steatosis levels across donors.

**c**, Immunofluorescence staining for Ki-67 in wild type organoids and *APOB*<sup>-/-</sup> organoids generated from the same donor. Quantification of the Ki-67<sup>+</sup> cells/organoid area is shown to the right. *n* = 8 independent replicates for both conditions representative of 3 donors. Two-tailed *t*-test: n.s. = not significant.

**d**, Nile Red lipid staining of an early and late passage *APOB*<sup>-/-</sup> organoid line, demonstrating constant steatosis levels across culture time.

**c**, The box indicates the 25-75th percentiles, the centre line indicates the median and the whiskers indicate minimum and maximum values.

**a, b, c, d**, Representative of *n* = 9, 9, 2, and 3 independent experiments, respectively.

Scale bars, 200  $\mu$ m (**a**), 100  $\mu$ m (**b**), 25  $\mu$ m (**c, d**).



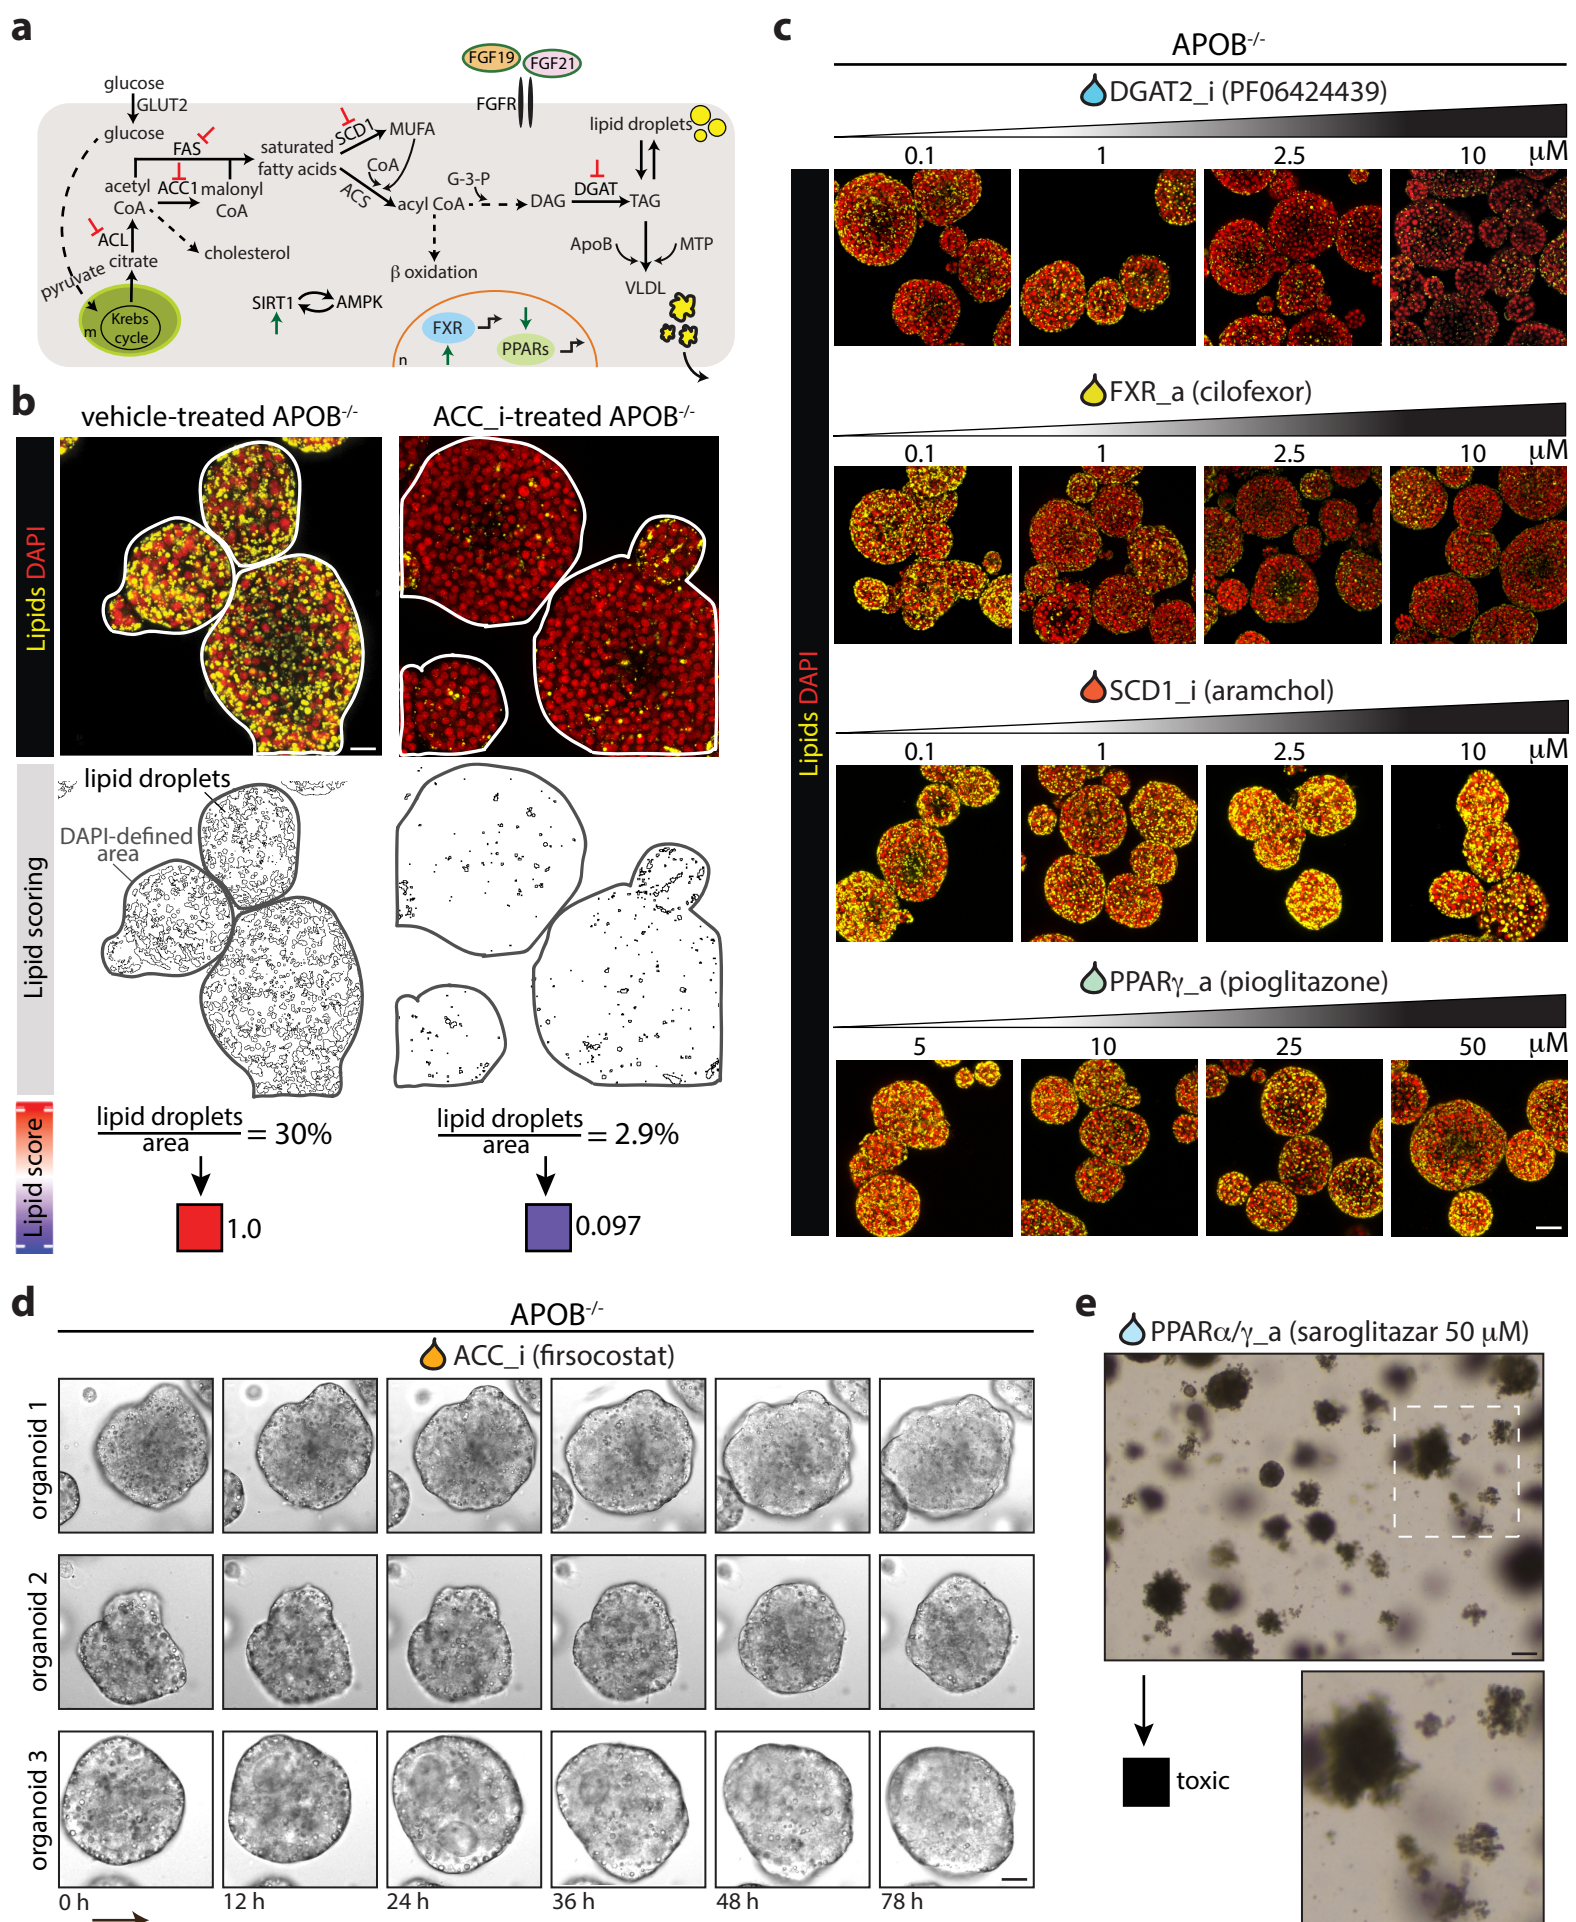

### Supplementary Figure 7. NAFLD drug screening using a lipid scoring system.

**a**, Schematic representation of the hepatocyte targets of some of the evaluated NAFLD drug candidates.

**b**, Example of the lipid scoring system in *APOB*<sup>-/-</sup> organoids treated with vehicle or ACC\_i. The area of a Z-projected organoid is assessed and outlined based on the presence of DAPI signal (nuclei). The Z-stack is converted to a binary image based on a set threshold from the fluorescent signal from the Nile Red lipid staining. The area occupancy of the particles (lipid droplets) within the organoid is subsequently calculated within the nuclei (DAPI)-defined area. The lipid score represents a relative score ranging from 0 (blue) to 1 (red), where the lipid score of vehicle-treated steatosis organoids per model is set to 1 and those of wild type organoids to 0.

**c**, Nile Red lipid staining showing the dose responses in *APOB*<sup>-/-</sup> organoids of the effective drugs DGAT2\_i and FXR\_a, and ineffective drugs SCD1\_i and PPAR $\gamma$ \_a.

**d**, Brightfield images of a live-imaging session of *APOB*<sup>-/-</sup> organoids upon treatment with ACC\_i during 78 hours of treatment. See also **Supplementary Video 1**.

**e**, Example of a drug exposure classified as toxic. Note the obvious disintegration of the *APOB*<sup>-/-</sup> organoids upon 7 day-treatment with 50  $\mu$ M saroglitazar.

**b, c, d, e**, Representative of  $n = 4, 4, 3,$  and  $4$  independent experiments, respectively.

Scale bars, 50  $\mu$ m (**b, d**), 100  $\mu$ m (**c**), 200  $\mu$ m (**e**).

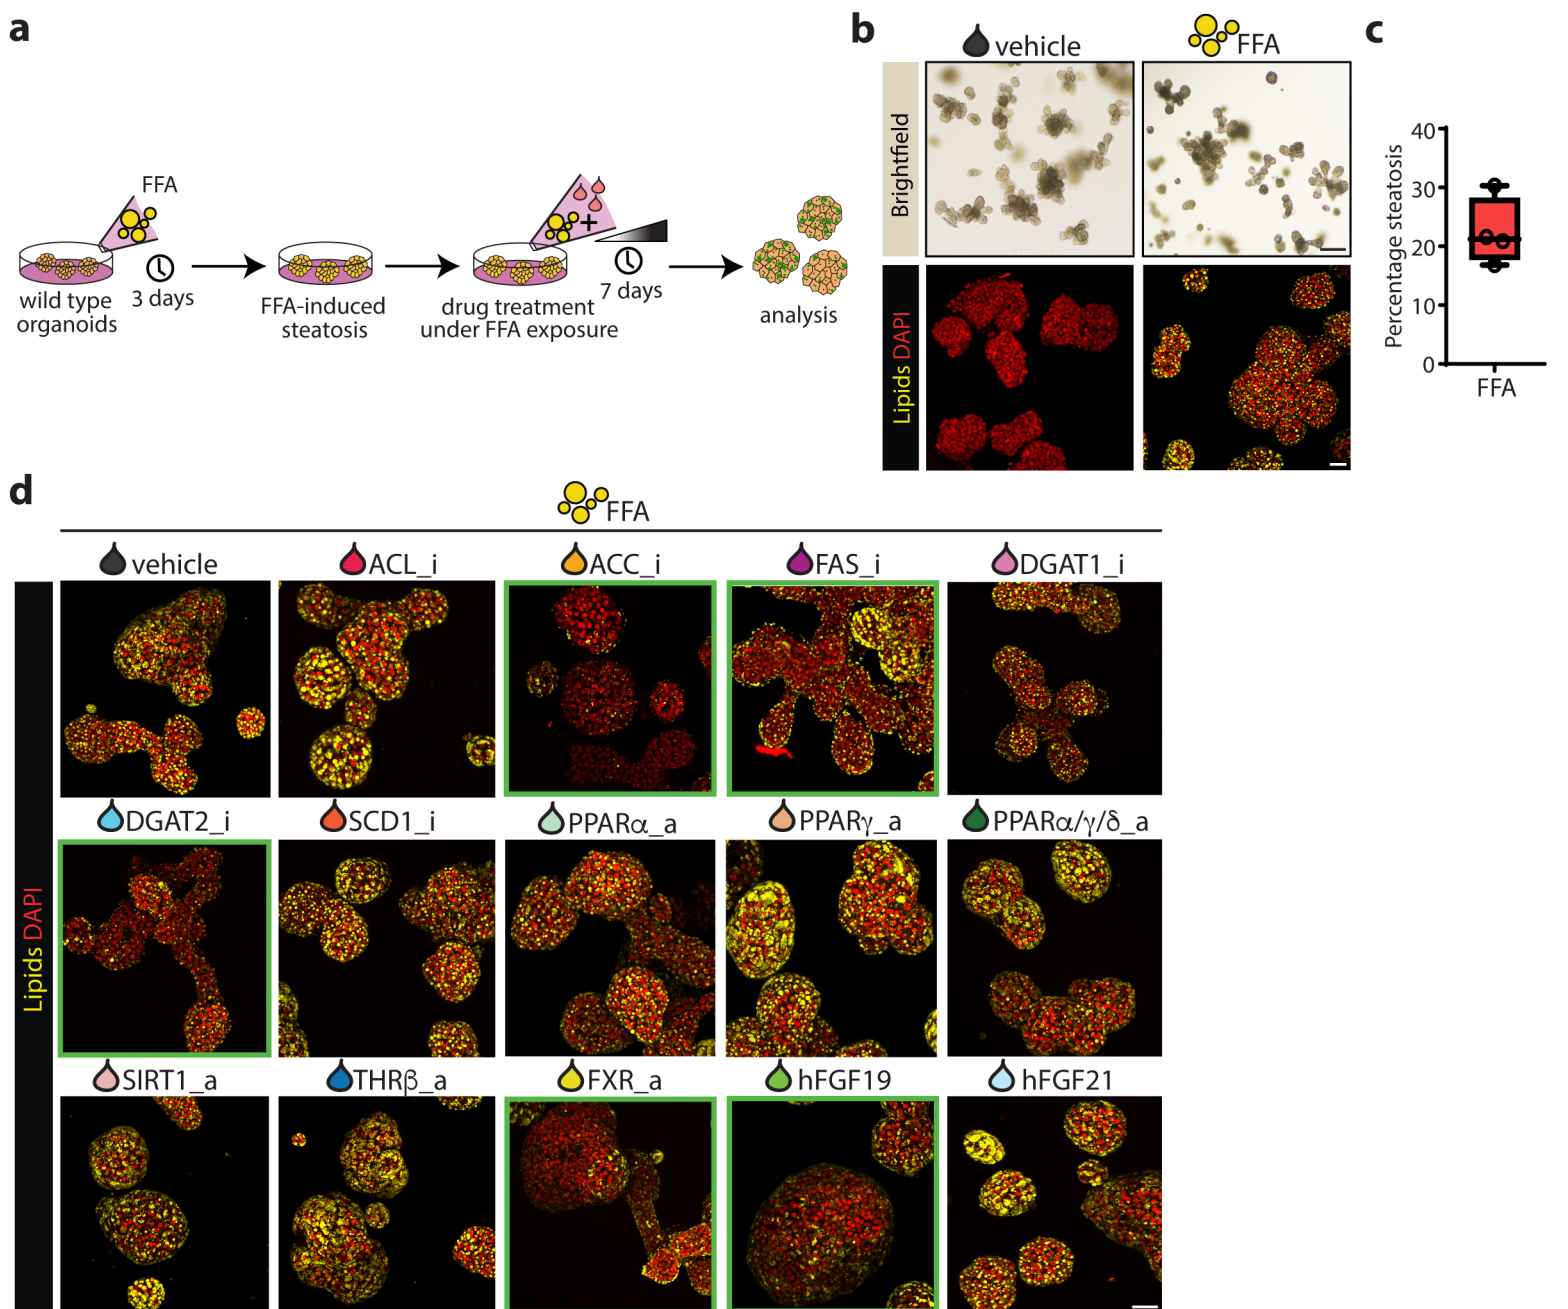

### Supplementary Figure 8. Drug responses of FFA-induced steatosis organoids.

**a**, Strategy to perform drug screening in FFA-induced steatosis organoids.

**b**, Brightfield images and Nile Red lipid staining of organoids treated with vehicle or FFAs (500  $\mu$ M) for 3 days.

**c**, Quantification of the percentage of steatosis after FFA exposure for 3 days prior to drug treatment.  $n = 4$  independent replicates representative of 2 donors.

**d**, Nile Red lipid staining of the FFA-induced steatosis organoids after treatment with different drugs for 7 days. Green boxes highlight steatosis-reducing effects.

**c**, The box indicates the 25-75th percentiles, the centre line indicates the median and the whiskers indicate minimum and maximum values.

**b, d**, Representative of  $n = 2$  independent experiments using 2 donors.

Scale bars, 200  $\mu$ m (brightfield) and 50  $\mu$ m (fluorescence) (**b**), 50  $\mu$ m (**d**).



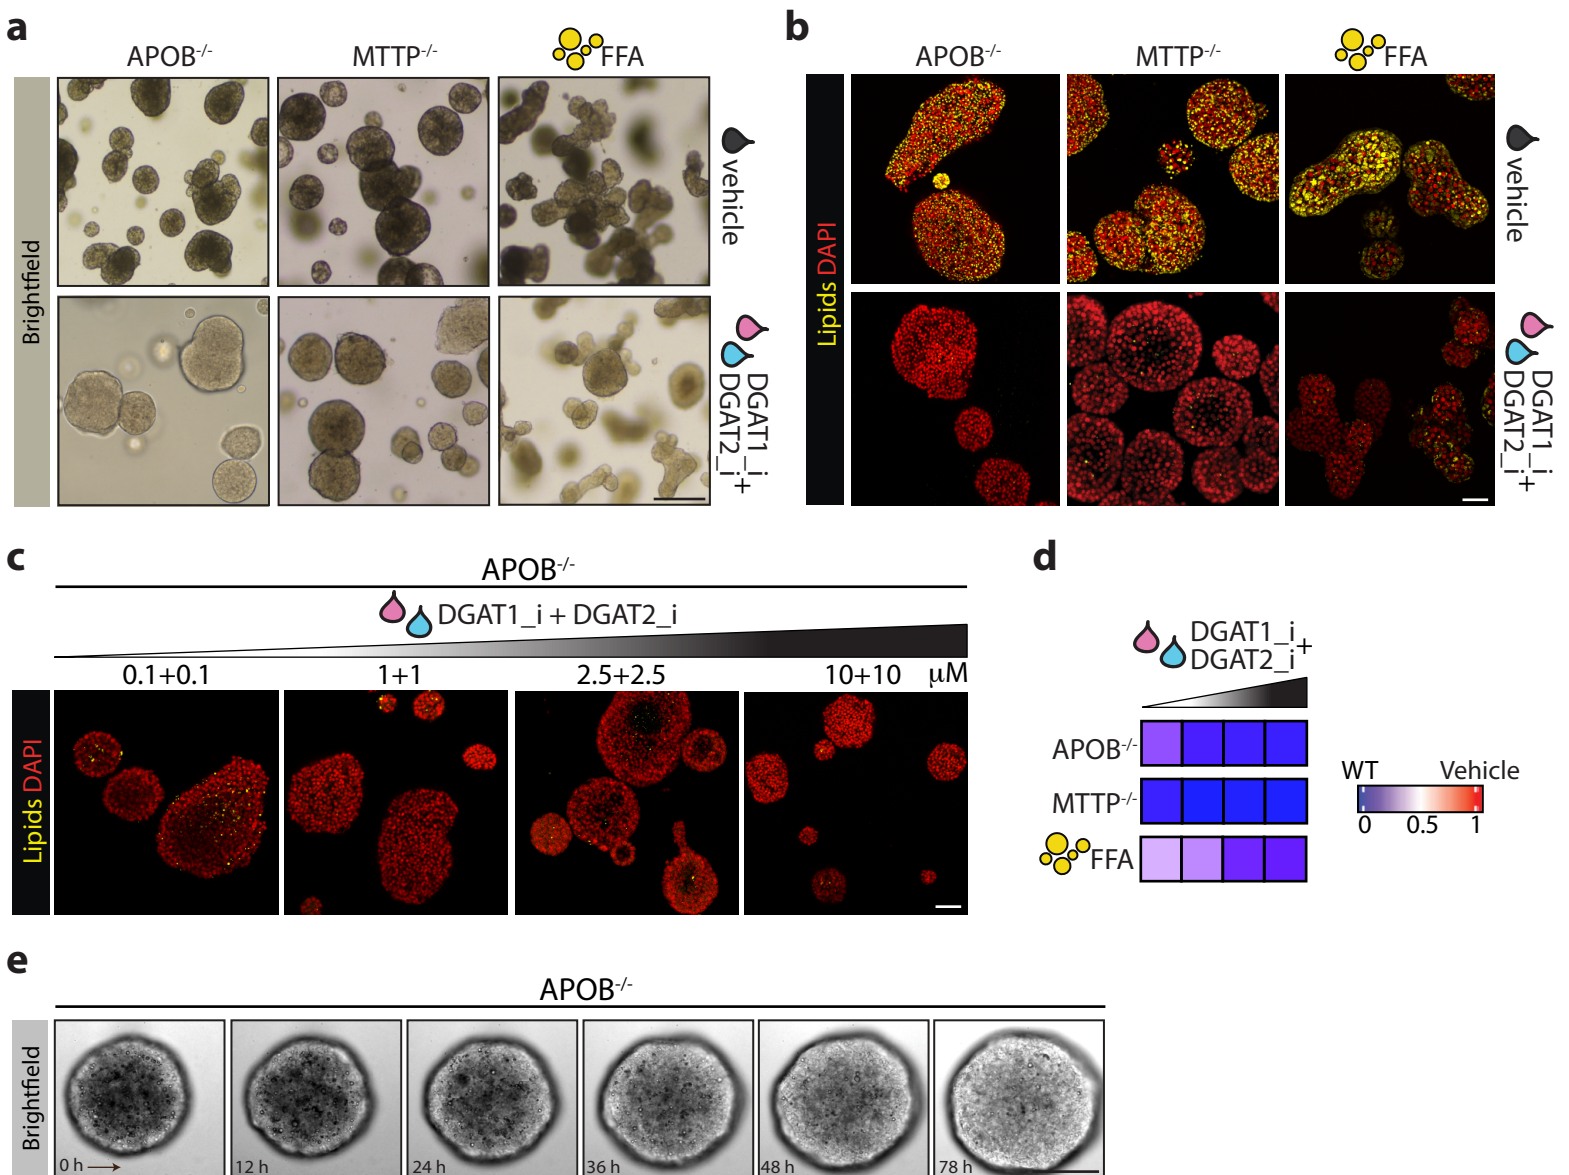

**Supplementary Figure 9. Synergistic steatosis-reducing effect of combined DGAT1 and DGAT2 inhibition.**

**a**, Brightfield images of genetic steatosis (*APOB*<sup>-/-</sup> and *MTTP*<sup>-/-</sup>) and FFA-induced steatosis organoids after treatment with combined DGAT1<sub>i</sub> + DGAT2<sub>i</sub> (2.5 μM + 2.5 μM) or vehicle.

**b**, Nile Red lipid staining of genetic steatosis (*APOB*<sup>-/-</sup> and *MTTP*<sup>-/-</sup>) and FFA-induced steatosis organoids after treatment with combined DGAT1<sub>i</sub> + DGAT2<sub>i</sub> (2.5 μM + 2.5 μM) or vehicle.

**c**, Nile Red lipid staining showing the dose responses in *APOB*<sup>-/-</sup> organoids of combined DGAT1<sub>i</sub> + DGAT2<sub>i</sub> treatment.

**d**, Lipid score analyses of the genetic steatosis (*APOB*<sup>-/-</sup> and *MTTP*<sup>-/-</sup>) and FFA-induced steatosis organoids upon treatment with increasing doses of DGAT1<sub>i</sub> + DGAT2<sub>i</sub>.

**e**, Brightfield images of a live-imaging session of *APOB*<sup>-/-</sup> organoids upon treatment with DGAT1<sub>i</sub> + DGAT2<sub>i</sub> during 78 hours of treatment.

**a**, **b**, **c**, **e**, Representative of n = 4, 4, 4, and 3 independent experiments, respectively.

Scale bars, 200 μm (**a**), 50 μm (**b**, **c**), 100 μm (**e**).



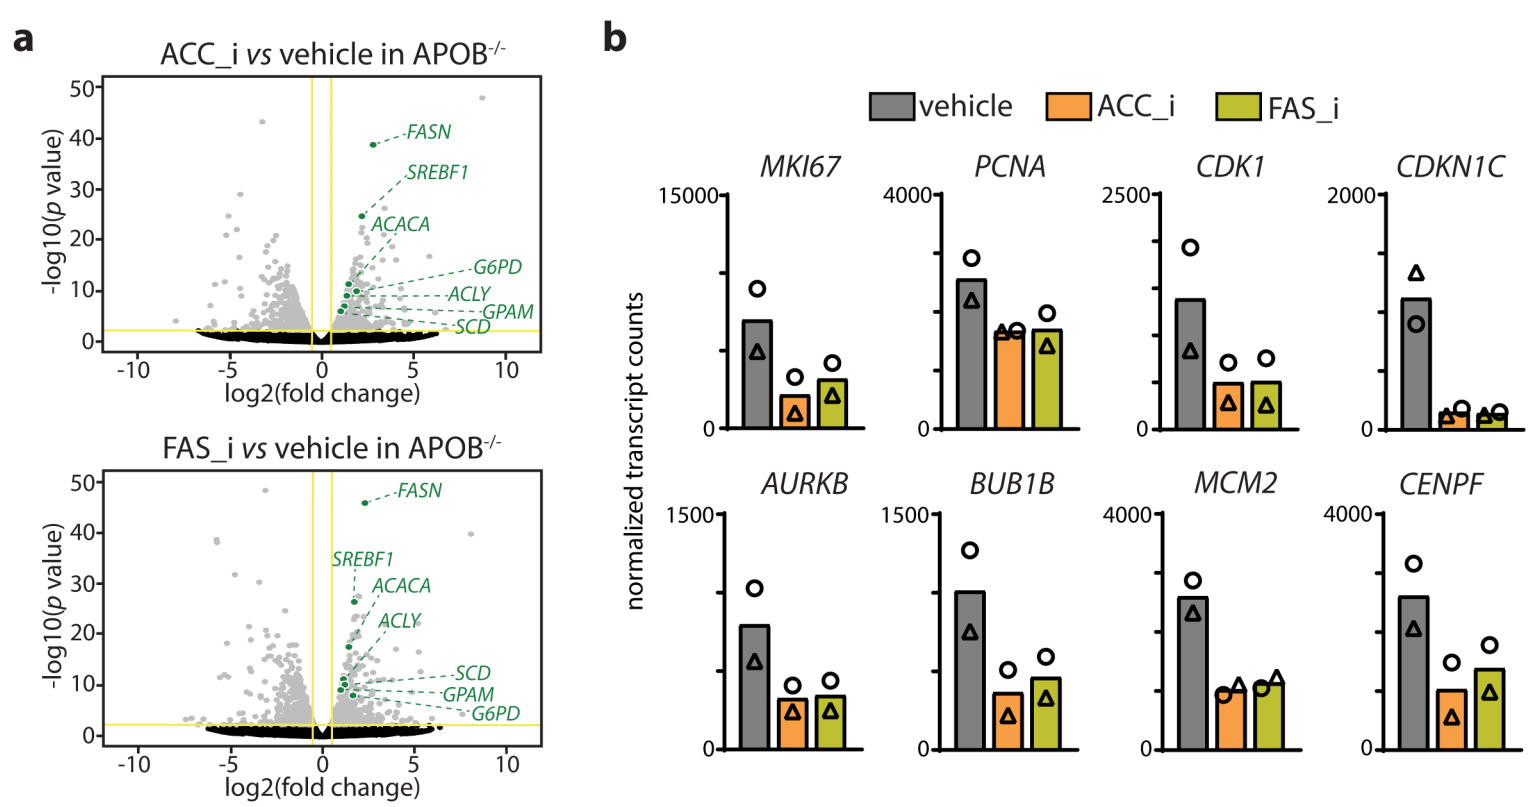

**Supplementary Figure 11. Overcompensation by lipogenic enzyme induction and impaired proliferation caused by inhibition of ACC and FAS.**

**a**, Volcano plots showing differential gene expression after treatment with ACC\_i (top) and FAS\_i (bottom) relative to vehicle-treated *APOB*<sup>-/-</sup> organoids. Grey dots indicate DEGs ( $|\log_2FC| > 0.5$ ,  $P < 0.005$  (Wald test)). Annotated genes highlight the counterintuitive induction of many lipogenic genes.

**b**, Bar plots (mean is shown) demonstrating the reduced expression of several genes implicated in DNA replication and the cell cycle after treatment with ACC\_i and FAS\_i.  $n = 2$  independent replicates with each symbol representing the expression in an *APOB*<sup>-/-</sup> line from 2 donors.



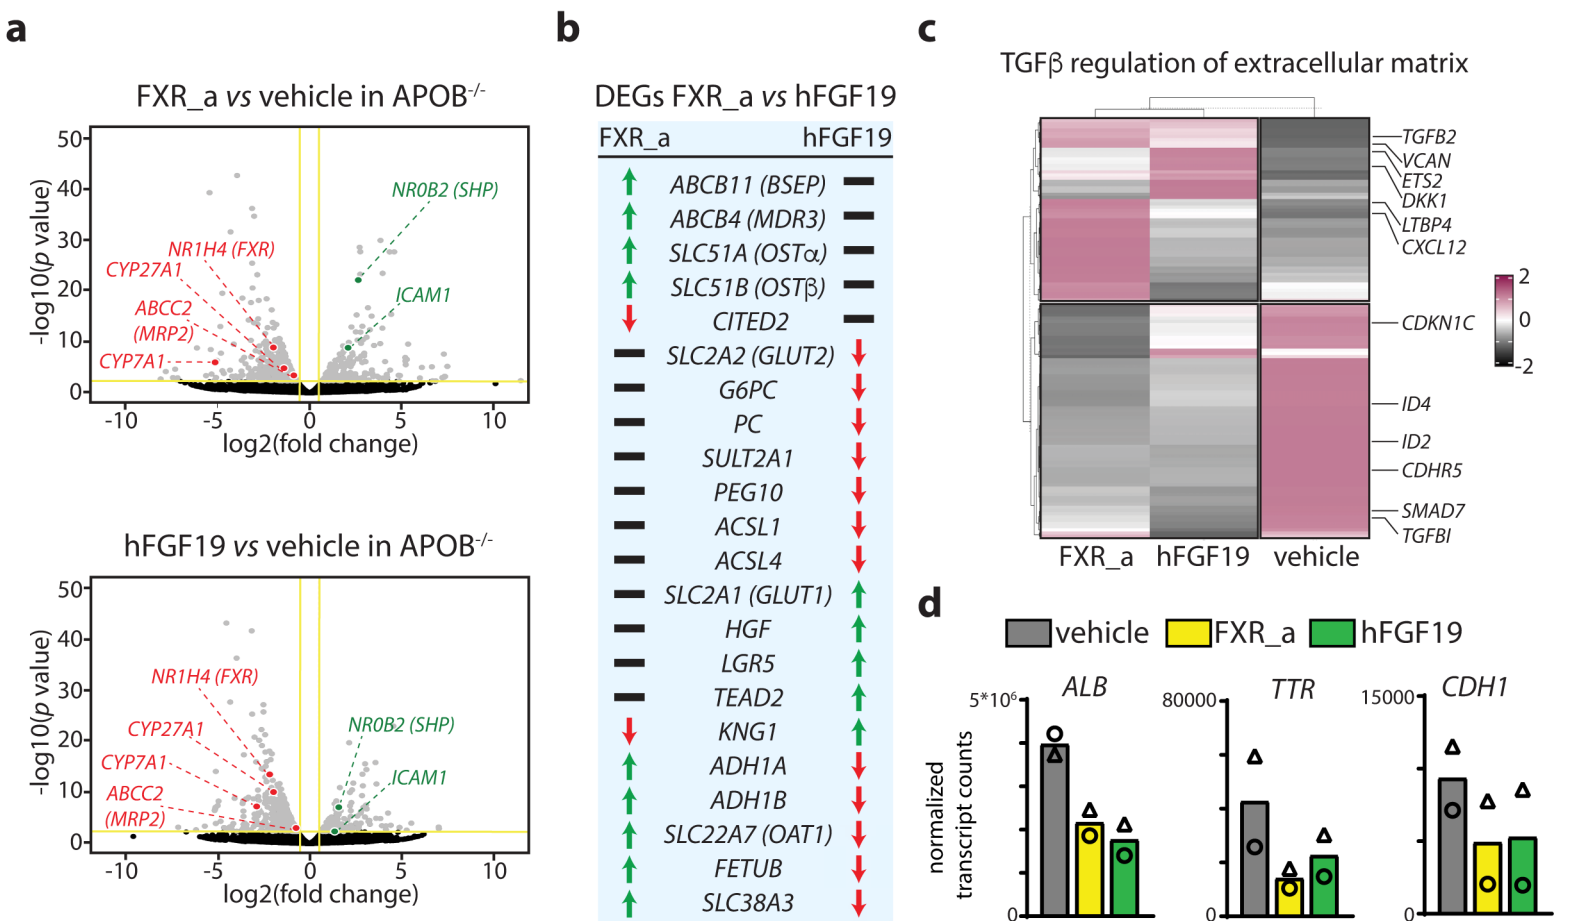

**Supplementary Figure 12. FXR activation and hFGF19 treatment regulate bile acid homeostasis and induce EMT-like traits.**

**a**, Volcano plots showing differential gene expression after treatment with FXR\_a (top) and hFGF19 (bottom) relative to vehicle-treated *APOB*<sup>-/-</sup> organoids. Grey dots indicate DEGs ( $|\log_2FC| > 0.5$ ,  $P < 0.005$  (Wald test)). Annotated genes highlight typical FXR target genes.

**b**, List of unique DEGs found in either FXR\_a- or hFGF19-treated *APOB*<sup>-/-</sup> organoids. Green arrows denote upregulation, red arrows indicate downregulation, black lines indicate no significant change in expression.

**c**, Heatmap displaying the expression of genes related to TGF $\beta$  regulation of extracellular matrix after treatment with FXR\_a and hFGF19 relative to vehicle-treated *APOB*<sup>-/-</sup> organoids. Row Z-scores are plotted.

**d**, Bar plots (mean is shown) demonstrating reduced expression of hepatocyte markers (*ALB*, *TTR*) and the epithelial marker *CDH1* after treatment with FXR\_a and hFGF19.  $n = 2$  independent replicates with each symbol representing the expression in an *APOB*<sup>-/-</sup> line from 2 donors.

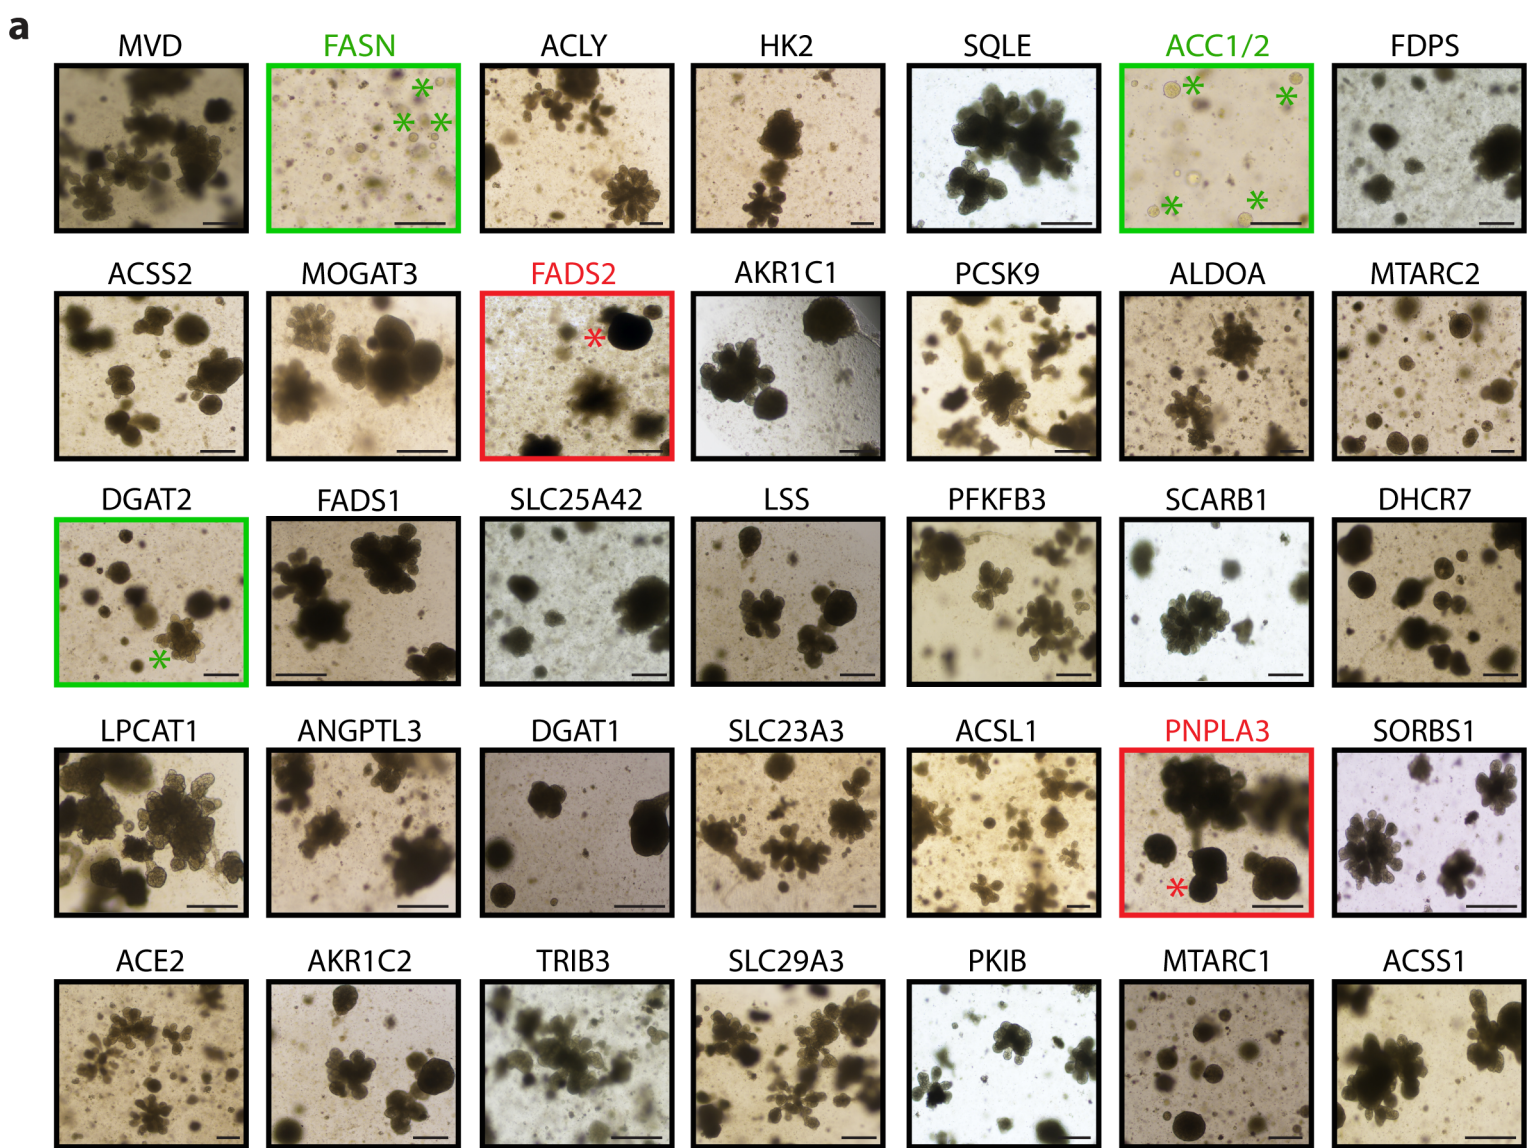

**Supplementary Figure 13. CRISPR LOF screening in FatTracer highlights steatosis mediators.**

**a**, Brightfield images of outgrowing FatTracer organoids upon CRISPR LOF of the respective genes. Green boxes highlight appearance of lighter -less lipid containing- organoids, while red boxes highlight appearance of darker -more lipid containing- organoids. Note that differences in organoid morphology are due to the donor-to-donor variability. Representative of  $n = 2$  independent experiments using both  $APOB^{-/-}$  and  $MTTP^{-/-}$  organoids from 2 donors as FatTracer. Scale bar, 100  $\mu\text{m}$ .



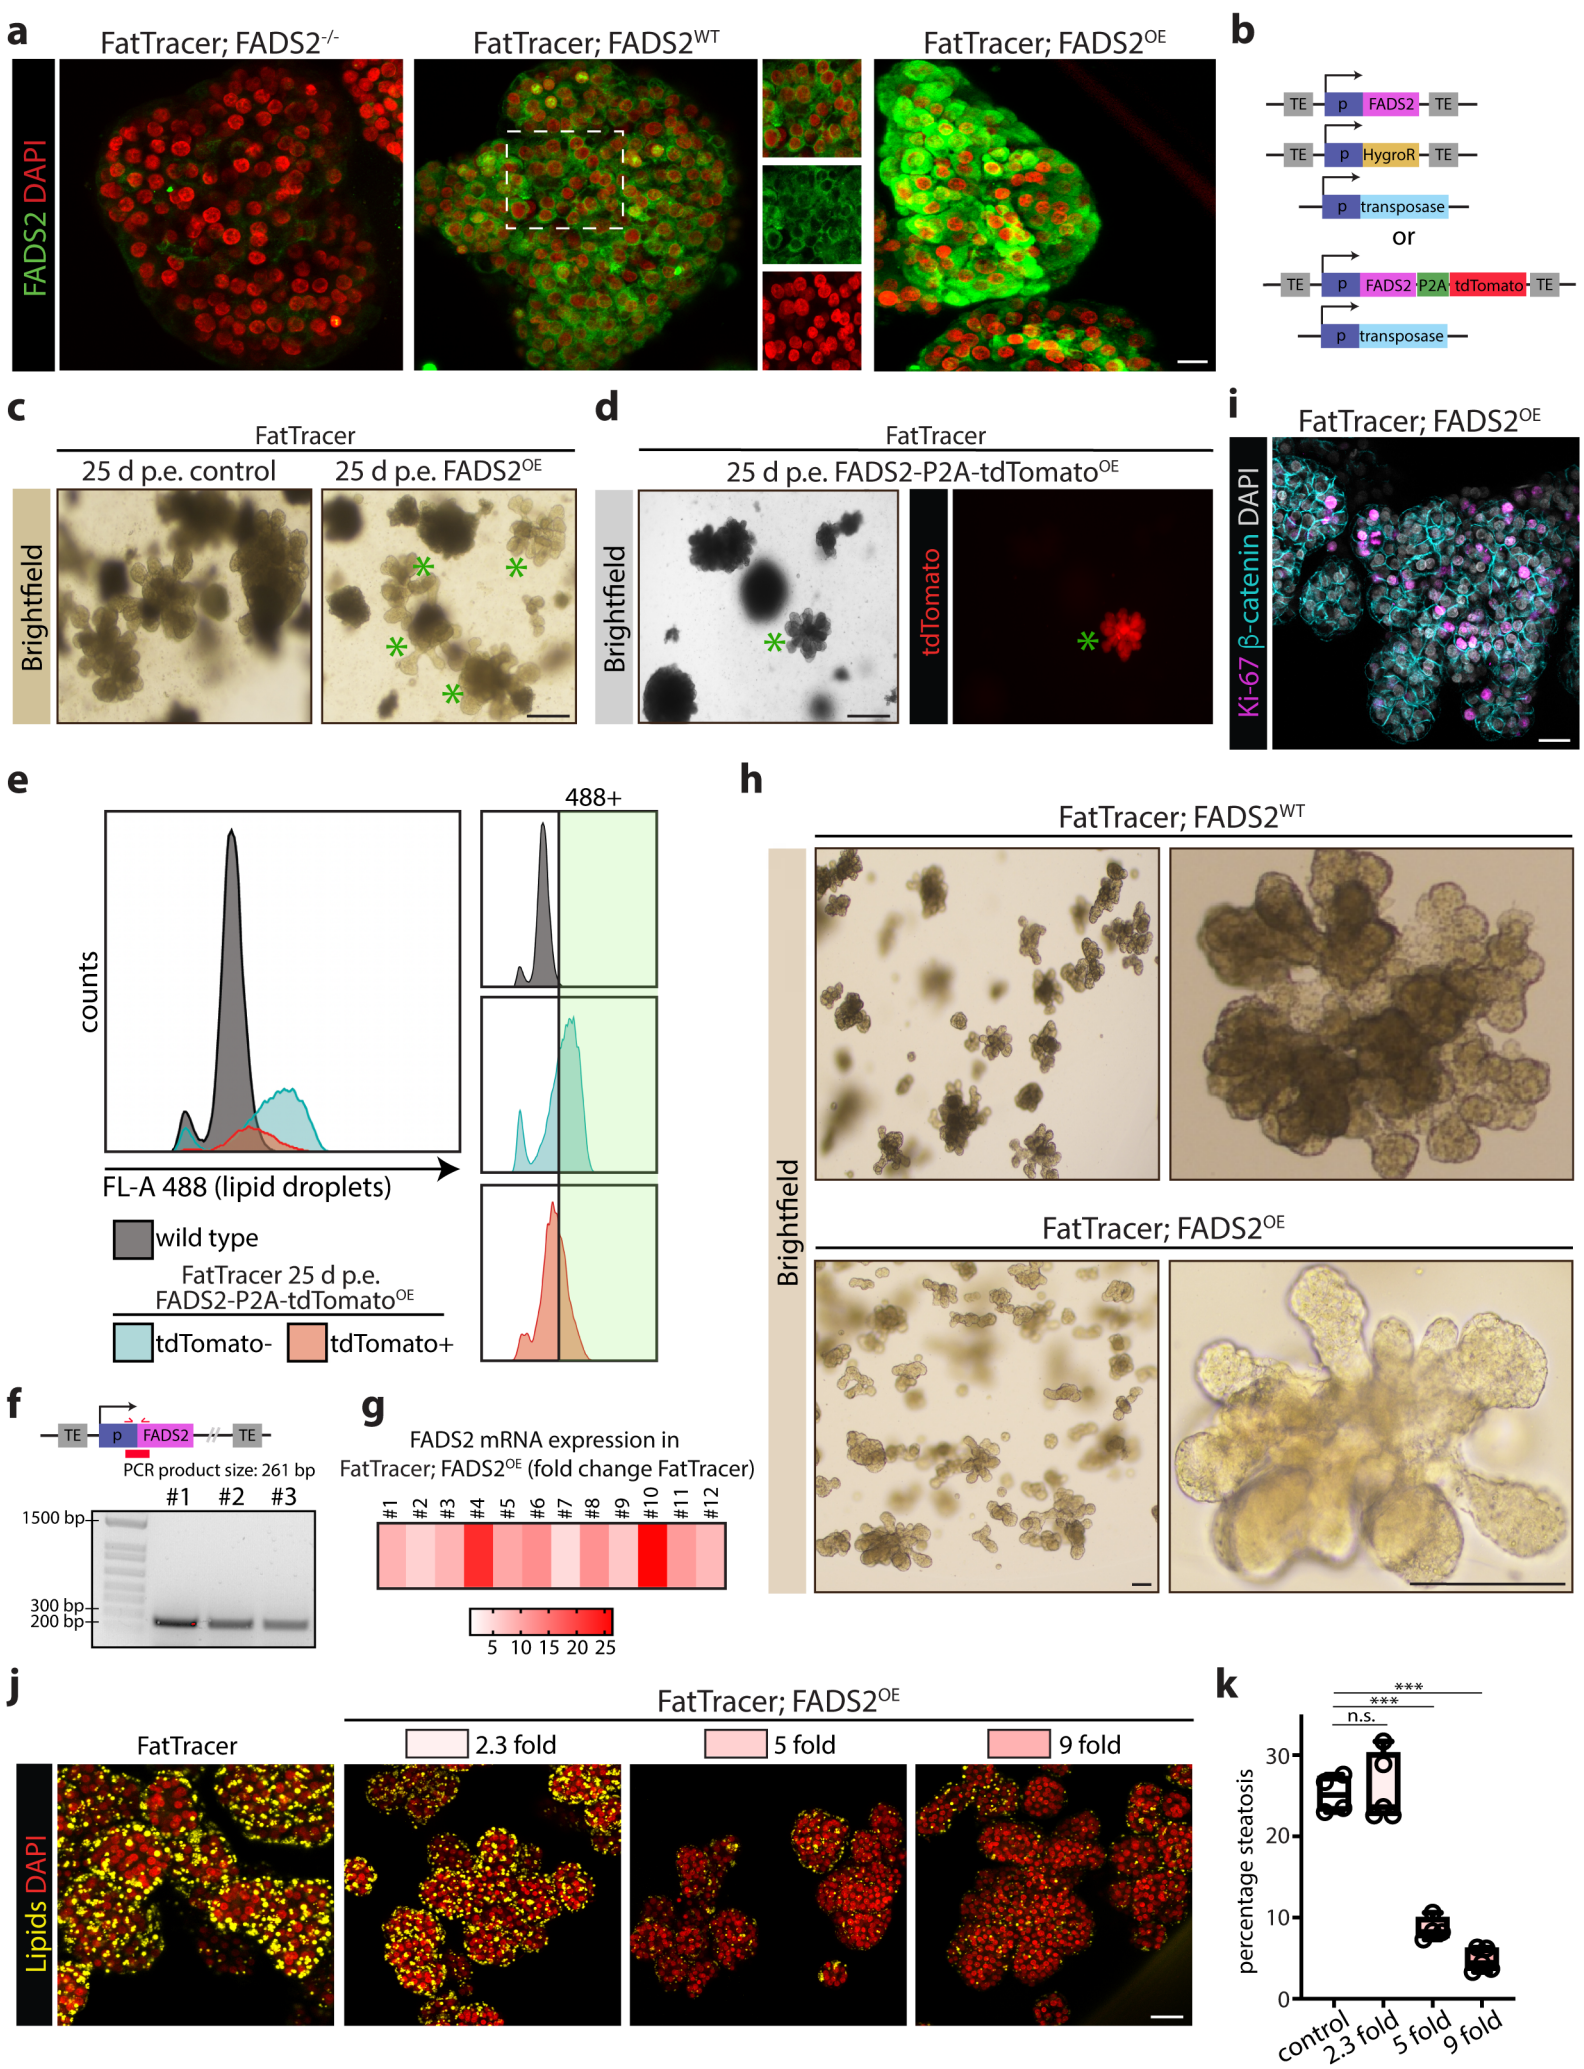



### Supplementary Figure 14. FADS2 overexpression alleviates steatosis in FatTracer.

**a**, Immunofluorescence staining for FADS2 in FADS2 variant FatTracer organoids.

**b**, Schematic of the constructs used to overexpress FADS2 or FADS2-P2A-tdTomato using a transposon-based strategy.

**c**, Brightfield images of outgrowing FatTracer organoids upon transfection with the FADS2 overexpression construct. Asterisks highlight the appearance of lighter -less lipid containing- organoids.

**d**, Brightfield and red fluorescence images of outgrowing FatTracer organoids upon transfection with the FADS2-P2A-tdTomato overexpression construct. The asterisk highlights the appearance of a lighter -less lipid containing- organoid tdTomato<sup>+</sup> organoid.

**e**, FACS analysis of single cells from a FatTracer culture transfected with the FADS2-P2A-tdTomato construct 25 days p.e., as well as single cells from wild type organoids using the BioTracker 488 Green Lipid Dye, demonstrating that FADS2-overexpressing FatTracer cells (tdTomato<sup>+</sup>) show reduced lipid droplet intensity (nearing wild type cells) as compared to FatTracer cells not overexpressing FADS2 (tdTomato<sup>-</sup>).

**f**, Schematic representation of the PCR amplification area to confirm genomic integration of CAG-FADS2 (top) and gel results demonstrating integration of the construct with the expected size in different FatTracer; FADS2<sup>OE</sup> lines (bottom).

**g**, Level of FADS2 mRNA overexpression in different FatTracer; FADS2<sup>OE</sup> lines relative to the parental FatTracer lines generated from 2 different donors, as determined by qPCR analysis.

**h**, Brightfield images (low and high magnification) of FatTracer and FatTracer; FADS2<sup>OE</sup> lines.

**i**, Immunofluorescence staining for Ki-67 and  $\beta$ -catenin in FatTracer; FADS2<sup>OE</sup> organoids.

**j**, Nile Red lipid staining of FatTracer lines with various degrees of FADS2 overexpression, demonstrating that a threshold amount of FADS2 is needed for steatosis-reducing effects.

**k**, Quantification of the percentage of steatosis in FatTracer lines with various degrees of FADS2 overexpression in comparison to the original FatTracer line. n = 4 independent replicates for control and 5 fold conditions, n = 5 independent replicates for 2.3 fold and 9 fold conditions. Two-tailed *t*-test:  $P < 0.0001$  (\*\*\*) ; n.s. = not significant.

**k**, The box indicates the 25-75th percentiles, the centre line indicates the median and the whiskers indicate minimum and maximum values.

**a, c, d, f, h, i, j**, Representative of n = 2, 6, 6, 6, 6, 2, 3 independent experiments, respectively using both *APOB*<sup>-/-</sup> and *MTTP*<sup>-/-</sup> organoids as FatTracer from 2 donors.

Scale bars, 25  $\mu$ m (**a, i**), 200  $\mu$ m (**c, d**), 100  $\mu$ m (**h**), 50  $\mu$ m (**j**).

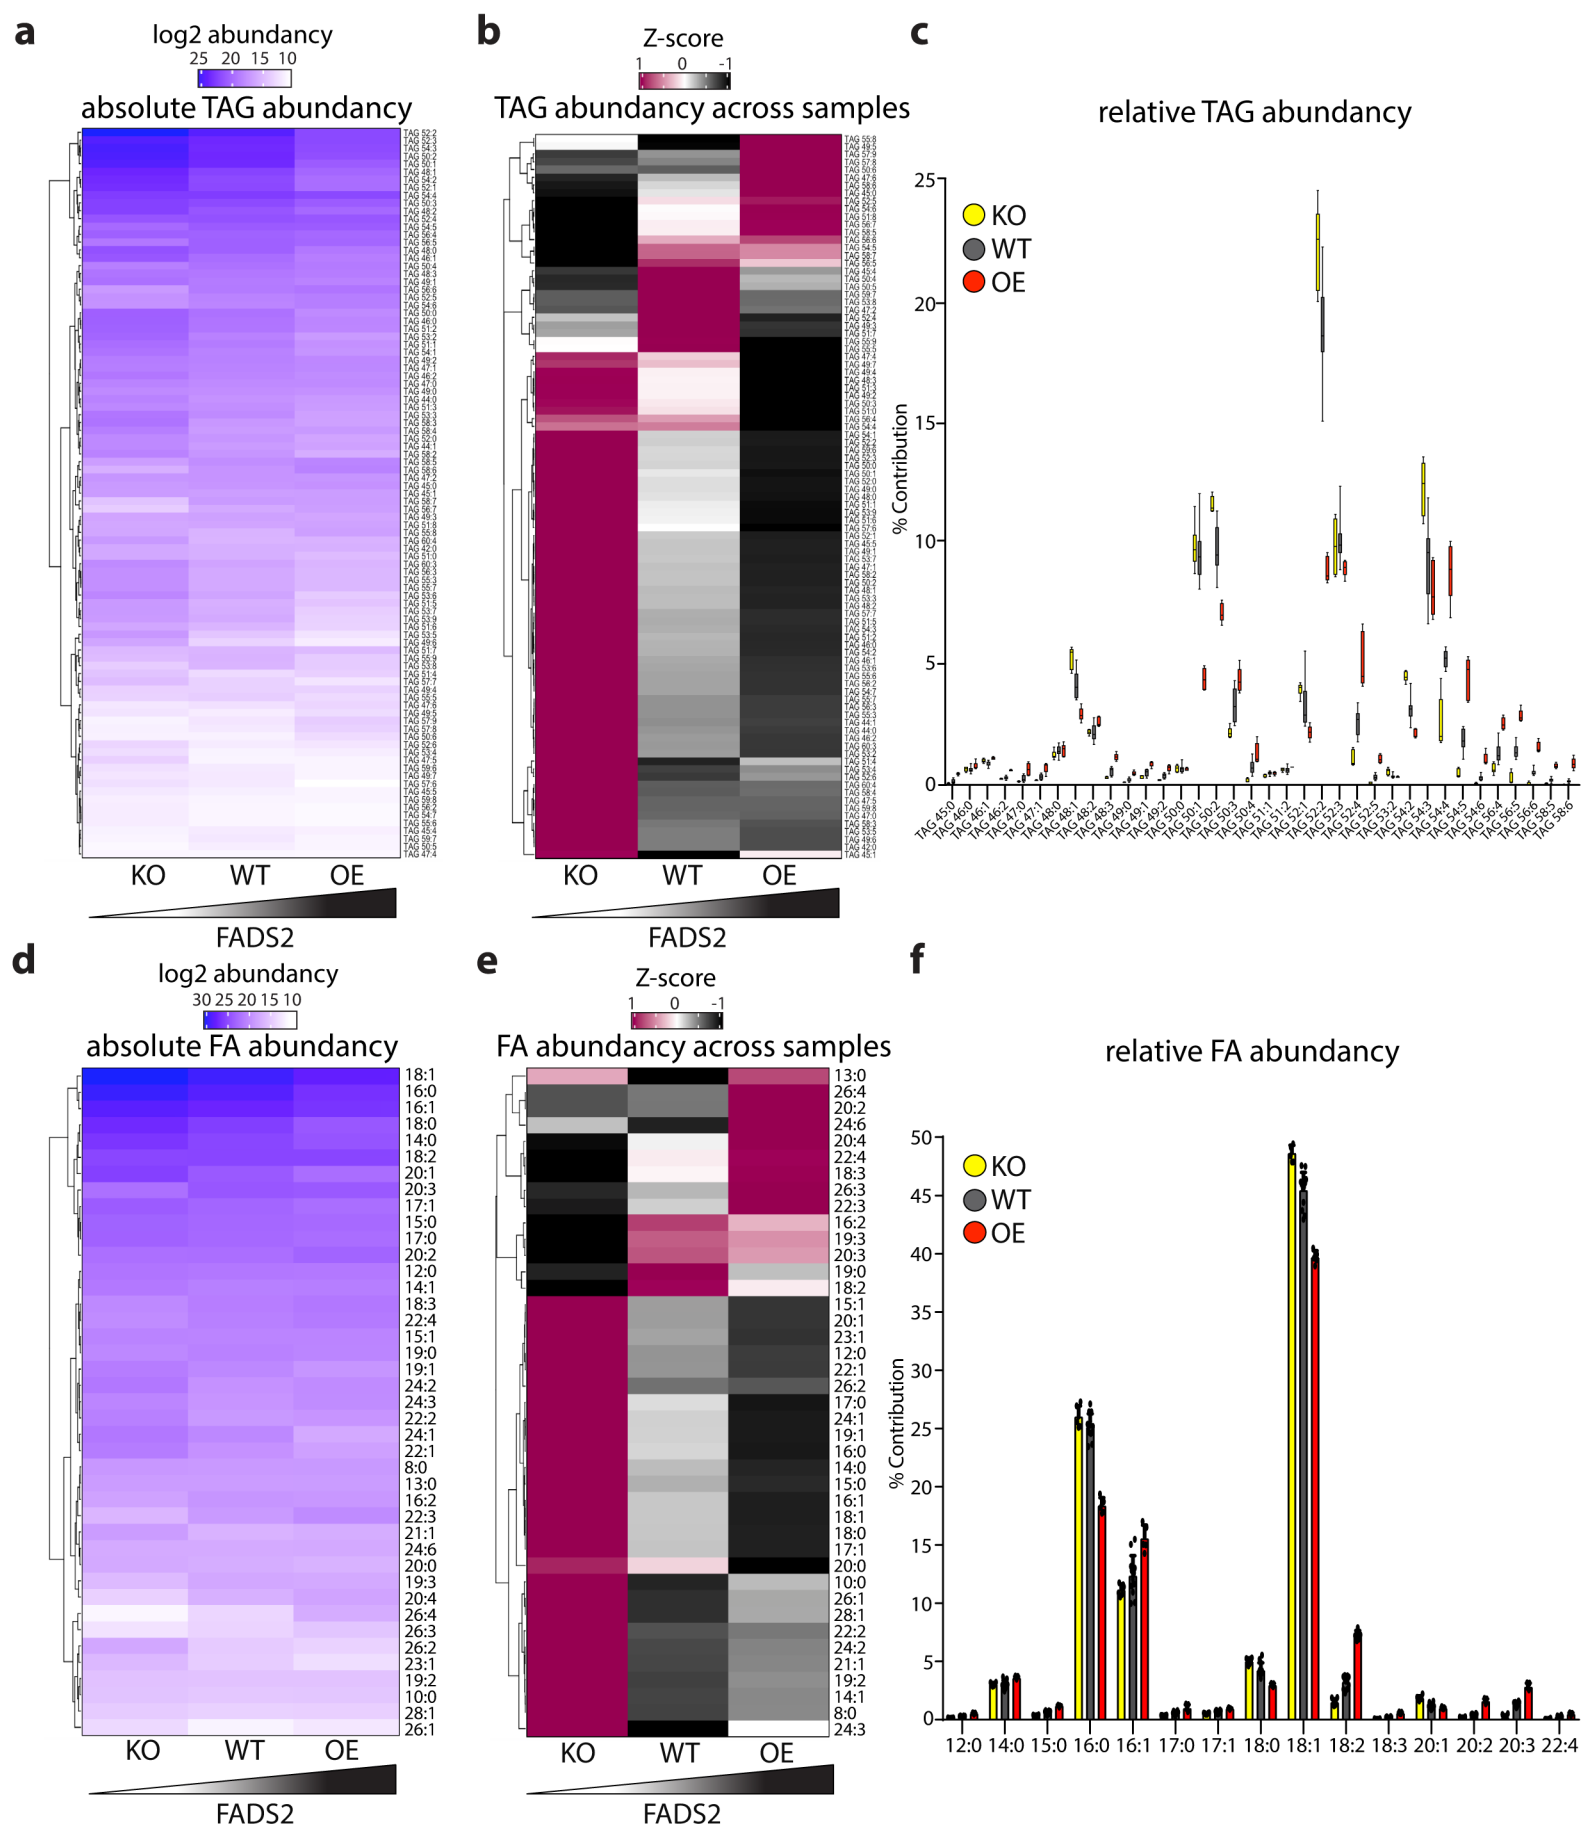

**Supplementary Figure 15. Lipidomic analyses of FADS2 variant FatTracer organoids.**

**a**, Heatmap displaying the average absolute abundance (log<sub>2</sub>-transformed) of all detected TAG species in FADS2 variant FatTracer organoids. Data are derived from n = 6 independent measurements in 3 different clonal lines from 2 donors for FatTracer; FADS2<sup>-/-</sup> and FatTracer; FADS2<sup>OE</sup>, n = 12 independent measurements in FatTracer; FADS2<sup>WT</sup> from the same 2 donors.

**b**, Heatmap displaying the average TAG species abundance in FADS2 variant FatTracer organoids. Row Z-scores are plotted.

**c**, Box plots depicting the relative TAG species abundance within FADS2 variant FatTracer organoids.

**d**, Heatmap displaying the average absolute abundance (log<sub>2</sub>-transformed) of all detected fatty acid (FA) species in TAG of FADS2 variant FatTracer organoids.

**e**, Heatmap displaying the average FA abundance in TAG of FADS2 variant FatTracer organoids. Row Z-scores are plotted.

**f**, Bar plots depicting the relative FA abundance in TAG within FADS2 variant FatTracer organoids (mean + SD).

**b-f**, Sample sizes as in **a**.

**c**, The box indicates the 25-75th percentiles, the centre line indicates the median and the whiskers indicate minimum and maximum values.

**Supplementary Table 1. Donor information and NAFLD risk SNP characteristics of the human fetal hepatocyte organoid lines used in this study.**

| <b>Donor</b> | <b>Age (GW)</b> | <b>Gender</b> | <b>PNPLA3<br/>rs738409 (I148M)</b> | <b>TM6SF2<br/>rs58542926 (E167K)</b> | <b>GCKR<br/>rs1260326 (P446L)</b> |
|--------------|-----------------|---------------|------------------------------------|--------------------------------------|-----------------------------------|
| A            | 12              | F             | I148I/I148I                        | E167E/E167E                          | P446P/P446P                       |
| B            | 8               | M             | I148I/I148I                        | E167E/E167E                          | P446P/ <b>P446L</b>               |
| C            | 14              | M             | I148I/I148I                        | E167E/E167E                          | P446P/P446P                       |
| D            | 20              | F             | I148I/I148I                        | E167E/E167E                          | P446P/P446P                       |

**Supplementary Table 2. Details of NAFLD drug candidate screening.**

| <b>Drug</b>           | <b>Target</b>                                                                                                | <b>Activation/<br/>Inhibition</b> | <b>Concentrations<br/>tested</b> | <b>Vendor</b>  |
|-----------------------|--------------------------------------------------------------------------------------------------------------|-----------------------------------|----------------------------------|----------------|
| Bempeoic acid         | ATP citrate lyase (ACL)                                                                                      | Inhibition                        | 5 – 10 – 25 – 50 $\mu$ M         | MedChemExpress |
| Firsocostat (GS-0976) | Acetyl-CoA carboxylase (ACC)                                                                                 | Inhibition                        | 0.1 – 1 – 2.5 – 10 $\mu$ M       | SelleckChem    |
| Cardarine (GW-501516) | Peroxisome proliferator-activated receptor $\delta$ (PPAR $\delta$ )                                         | Activation                        | 0.1 – 1 – 2.5 – 10 $\mu$ M       | Sigma-Aldrich  |
| TVB2640 (ASC-40)      | Fatty acid synthase (FAS)                                                                                    | Inhibition                        | 0.1 – 1 – 2.5 – 10 $\mu$ M       | InvivoChem     |
| Aramchol              | Stearoyl-CoA desaturase 1 (SCD1)                                                                             | Inhibition                        | 0.1 – 1 – 2.5 – 10 $\mu$ M       | Sigma-Aldrich  |
| SRT2104               | Sirtuin 1 (SIRT1)                                                                                            | Activation                        | 0.1 – 1 – 2.5 – 10 $\mu$ M       | SelleckChem    |
| Resmetirom (MGL-3196) | Thyroid hormone receptor $\beta$ (THR $\beta$ )                                                              | Activation                        | 0.1 – 1 – 2.5 – 10 $\mu$ M       | MedChemExpress |
| Cilofexor (GS-9674)   | Farsenoid X receptor (FXR)                                                                                   | Activation                        | 0.1 – 1 – 2.5 – 10 $\mu$ M       | MedChemExpress |
| Saroglitazar          | Peroxisome proliferator-activated receptor $\alpha$ and $\gamma$ (PPAR $\alpha/\gamma$ )                     | Activation                        | 5 – 10 – 25 – 50 $\mu$ M         | MedChemExpress |
| Fenofibrate           | Peroxisome proliferator-activated receptor $\alpha$ (PPAR $\alpha$ )                                         | Activation                        | 5 – 10 – 25 – 50 $\mu$ M         | Sigma-Aldrich  |
| Elafibranor           | Peroxisome proliferator-activated receptor $\alpha$ and $\delta$ (PPAR $\alpha/\delta$ )                     | Activation                        | 5 – 10 – 25 – 50 $\mu$ M         | SelleckChem    |
| Lanifibranor          | Peroxisome proliferator-activated receptor $\alpha$ , $\gamma$ , and $\delta$ (PPAR $\alpha/\gamma/\delta$ ) | Activation                        | 5 – 10 – 25 – 50 $\mu$ M         | SelleckChem    |
| Pioglitazone          | Peroxisome proliferator-activated receptor $\gamma$ (PPAR $\gamma$ )                                         | Activation                        | 5 – 10 – 25 – 50 $\mu$ M         | Sigma-Aldrich  |
| PF 06424439           | Diacylglycerol O-acyltransferase 2 (DGAT2)                                                                   | Inhibition                        | 0.1 – 1 – 2.5 – 10 $\mu$ M       | Tocris         |
| AZD 3988              | Diacylglycerol O-acyltransferase 1 (DGAT1)                                                                   | Inhibition                        | 0.1 – 1 – 2.5 – 10 $\mu$ M       | Tocris         |
| Recombinant hFGF19    | $\beta$ -Klotho/FGFRs                                                                                        | Activation                        | 25 – 100 ng/ml                   | Peprtech       |
| Recombinant hFGF21    | $\beta$ -Klotho/FGFRs                                                                                        | Activation                        | 25 – 100 ng/ml                   | Peprtech       |

**Supplementary Table 3. CRISPR sequences used in this study.**

**Gene knock-out**

| <b>Plasmid name</b> | <b>Spacer sequence</b> |
|---------------------|------------------------|
| ACACA-KO-sgRNA      | CTTCCCTAATCTCTTCAGAC   |
| ACACB-KO-sgRNA      | GACAGATTTCTTACACTCCC   |
| ACE2-KO-sgRNA       | AGAACAGGTCTTCGGCTTCG   |
| ACLY-KO-sgRNA       | GAGCATACTTGAACCGATTC   |
| ACSL1-KO-sgRNA      | GAAGAGTACGCACGTAAGT    |
| ACSS1-KO-sgRNA      | TCCATGCCTCTTCAGCGTGT   |
| ACSS2-KO-sgRNA      | CATGCCCTGGCCATTCTT     |
| AKR1C1-KO-sgRNA     | TGTTACCTCTGCAGGCGCAT   |
| AKR1C2-KO-sgRNA     | ATCATTCAGCTTACACAC     |
| ALDOA-KO-sgRNA      | TGACATCGCTCACC GCATCG  |
| ANGPTL3-KO-sgRNA    | TAATTTGGCCCTTCGTCTTA   |
| APOB-KO-sgRNA       | CAGCCAGTGCACCCTGAAAG   |
| DGAT1-KO-sgRNA      | GCGACCCTGTCTCCGGCGC    |
| DGAT2-KO-sgRNA      | GACCTGCGCTGTGCGCGGAG   |
| DHCR7-KO-sgRNA      | TTGAGATGCGGTTCTGTCAT   |
| FADS1-KO-sgRNA      | GGCTGTCAGGCGCGTGCTCG   |
| FADS2-KO-sgRNA      | CCAGACTTACGTTCTTGCCG   |
| FASN-KO-sgRNA       | GGACAACCTCATCGGCGGTG   |
| FDPS-KO-sgRNA       | GATTCATCCCTTACCCGCCG   |
| HK2-KO-sgRNA        | GAAGTAGGCAAGCAGATGCG   |
| LPCAT1-KO-sgRNA     | CGCACCATGTGGTTCGCCGG   |
| LSS-KO-sgRNA        | GAACGGGATGACATTTTACG   |
| MOGAT3-KO-sgRNA     | GAAAGTGAGCACATATTGGT   |
| MTARC1-KO-sgRNA     | GTGCACTCCGCCTCGCTCAC   |
| MTARC2-KO-sgRNA     | TGGCTCGGGGTCGCCGCGCT   |
| MTTP-KO-sgRNA       | TGACCAGTTGATCCAAATAA   |
| MVD-KO-sgRNA        | GTGCAGAGTGACGCTCAGGG   |
| PCKS9-KO-sgRNA      | GGTGCTAGCCTTGCGTTCCG   |
| PFKFB3-KO-sgRNA     | TGTAGGTCTTGCCCCGGGCG   |
| PKIB-KO-sgRNA       | AAAATGACTGACGTGGAGTC   |
| PNPLA3-KO-sgRNA     | GCGCATGTTGTTTCGGCGCTT  |
| SCARB1-KO-sgRNA     | CCTGCGGCTTCTCGCCCTTC   |
| SLC23A3-KO-sgRNA    | CCCAGCCAACTCCGATCAGT   |
| SLC25A42-KO-sgRNA   | ATGATTTTGGTTCGGTCCAG   |
| SLC29A3-KO-sgRNA    | AATAGTGGCCGTTGTCTCAG   |
| SORBS1-KO-sgRNA     | CTGGTTTGCTTTCGTGTTGC   |
| SQLE-KO-sgRNA       | CGAGGAGACCCCGTTTCGG    |
| TRIB3-KO-sgRNA      | GCCCACTTCGAGCTCGTTTC   |

**Prime editing**

| <b>Plasmid name</b>   | <b>Spacer sequence</b> | <b>3'- extension</b>        |
|-----------------------|------------------------|-----------------------------|
| PNPLA3-I148M-pegRNA   | GGATAAGGCCACTGTAGAAG   | GCTTCATGCCCTTCTACAGTGGCCTTA |
| PNPLA3-I148-PE3-sgRNA | AAGGATCAGGAAAATTAATAA  | -                           |
